# Supplementary material for: Endonucleolytic cleavage is the primary mechanism of decay elicited byC. elegansnonsense-mediated mRNA decay
Source: HighWire-hosted journal article supplement (doi:10.1101/gr.280046.124), 2025-05-09
Supplement: Supplemental_Table_S1.xlsx [file Supplemental_Table_S1.xlsx]

## Sheet: Sheet1
	Sample ID	Lib Name	Raw Read Counts (fastq)	Processed Read Counts (extended bam)
	SES26	wtRep1	14264059	8325868
	SES64	wtRep2	8040792	2713732
	SES31	smg-2Rep1	14905324	7666279
	SES58	smg-2Rep2	11942720	4594249
	SES34	smg-5Rep1	8187235	4749444
	SES61	smg-5Rep2	13398619	5648084
	SES35	smg-6Rep1	6077944	3535880
	SES62	smg-6Rep2	10877099	5125070
	SES36	smg-7Rep1	19983284	8932252
	SES63	smg-7Rep2	11905934	5663357

## Sheet: README
Table S1: Short-Read RNA-Sequencing Library Metrics
