# Supplementary material for: Endonucleolytic cleavage is the primary mechanism of decay elicited byC. elegansnonsense-mediated mRNA decay
Source: HighWire-hosted journal article supplement (doi:10.1101/gr.280046.124), 2025-05-09
Supplement: Supplemental_Table_S3.xlsx [file Supplemental_Table_S3.xlsx]

## Sheet: Sheet3
gene	strain	replicate	nmd_status	adapted_rpm	unadapted_rpm
rps-27A	Wildtype	1	Target	0	74.1079
rps-27A	Wildtype	1	Non-Target	18.527	2260.29
rps-27A	Wildtype	1	Ambiguous	111.162	299.282
rps-15A	Wildtype	1	Target	29.9282	66.9821
rps-15A	Wildtype	1	Non-Target	7.12576	1829.89
rps-15A	Wildtype	1	Ambiguous	27.0779	168.168
rpl-30	Wildtype	1	Target	52.7306	96.9103
rpl-30	Wildtype	1	Non-Target	4.27545	1487.86
rpl-30	Wildtype	1	Ambiguous	55.5809	410.444
rps-27A	Wildtype	2	Target	1.899	93.0511
rps-27A	Wildtype	2	Non-Target	1.899	1227.7
rps-27A	Wildtype	2	Ambiguous	45.576	369.356
rps-15A	Wildtype	2	Target	5.697	32.283
rps-15A	Wildtype	2	Non-Target	2.8485	1133.7
rps-15A	Wildtype	2	Ambiguous	19.9395	208.89
rpl-30	Wildtype	2	Target	16.1415	51.273
rpl-30	Wildtype	2	Non-Target	0.949501	844.106
rpl-30	Wildtype	2	Ambiguous	21.8385	393.093
rps-27A	smg-6	2	Target	13.8646	2044.62
rps-27A	smg-6	2	Non-Target	8.97121	1784.46
rps-27A	smg-6	2	Ambiguous	22.8358	924.851
rps-15A	smg-6	2	Target	8.97121	1220.09
rps-15A	smg-6	2	Non-Target	5.70895	1583.01
rps-15A	smg-6	2	Ambiguous	5.70895	367.004
rpl-30	smg-6	2	Target	9.78678	1410.11
rpl-30	smg-6	2	Non-Target	2.44669	1181.75
rpl-30	smg-6	2	Ambiguous	13.8646	884.072
rps-27A	smg-5	2	Target	23.2979	2501.83
rps-27A	smg-5	2	Non-Target	10.7529	2055.59
rps-27A	smg-5	2	Ambiguous	21.5057	681.015
rps-15A	smg-5	2	Target	12.545	1657.73
rps-15A	smg-5	2	Non-Target	8.96072	1949.85
rps-15A	smg-5	2	Ambiguous	10.7529	390.687
rpl-30	smg-5	2	Target	8.96072	1720.46
rpl-30	smg-5	2	Non-Target	10.7529	1399.66
rpl-30	smg-5	2	Ambiguous	10.7529	838.723
rps-27A	Wildtype	3	Target	1.68549	85.9597
rps-27A	Wildtype	3	Non-Target	6.74194	1050.9
rps-27A	Wildtype	3	Ambiguous	58.992	399.46
rps-15A	Wildtype	3	Target	10.9557	30.3387
rps-15A	Wildtype	3	Non-Target	5.8992	1029.83
rps-15A	Wildtype	3	Ambiguous	18.5403	192.145
rpl-30	Wildtype	3	Target	24.4395	55.621
rpl-30	Wildtype	3	Non-Target	0.842743	803.134
rpl-30	Wildtype	3	Ambiguous	38.7662	432.327
rps-27A	smg-6	3	Target	10.6971	1199.86
rps-27A	smg-6	3	Non-Target	7.13141	987.7
rps-27A	smg-6	3	Ambiguous	3.5657	994.832
rps-15A	smg-6	3	Target	7.13141	602.604
rps-15A	smg-6	3	Non-Target	3.5657	798.718
rps-15A	smg-6	3	Ambiguous	12.48	254.948
rpl-30	smg-6	3	Target	7.13141	839.723
rpl-30	smg-6	3	Non-Target	0	682.832
rpl-30	smg-6	3	Ambiguous	7.13141	825.461
rps-27A	smg-5	3	Target	6.94265	1544.04
rps-27A	smg-5	3	Non-Target	4.85985	1222.6
rps-27A	smg-5	3	Ambiguous	16.6624	463.769
rps-15A	smg-5	3	Target	11.8025	1085.14
rps-15A	smg-5	3	Non-Target	4.16559	1022.65
rps-15A	smg-5	3	Ambiguous	6.24838	217.999
rpl-30	smg-5	3	Target	4.16559	1219.82
rpl-30	smg-5	3	Non-Target	2.08279	868.525
rpl-30	smg-5	3	Ambiguous	12.4968	503.342

## Sheet: README
Table S3: Coverage plots detected expression levels
