# Supplementary material for: Endonucleolytic cleavage is the primary mechanism of decay elicited byC. elegansnonsense-mediated mRNA decay
Source: HighWire-hosted journal article supplement (doi:10.1101/gr.280046.124), 2025-05-09
Supplement: Supplemental_Table_S4.xlsx [file Supplemental_Table_S4.xlsx]

## Sheet: 230927_totalMerge_fisherTestedO
chr_id	gene_id	gene_name	N2_v_smg-6_Rep2_fishers_significant	N2_v_smg-5_Rep2_fishers_significant	N2_v_smg-6_Rep3_fishers_significant	N2_v_smg-5_Rep3_fishers_significant	fishers_hit_count	ramani2009_hit	muir2018_hit	kim_modena2022_smg6_hit	kim_modena2022_smg1_hit	mitrovich_hit	prev_identified_count	NMD_isoform_ID
V	WBGene00019466	tos-1	TRUE	TRUE	TRUE	TRUE	4	TRUE	TRUE	TRUE	TRUE	FALSE	3	FALSE
V	WBGene00003844	odc-1	TRUE	TRUE	TRUE	TRUE	4	TRUE	TRUE	TRUE	TRUE	FALSE	3	N/A
IV	WBGene00004414	rpl-3	TRUE	TRUE	TRUE	TRUE	4	FALSE	TRUE	FALSE	FALSE	TRUE	2	TRUE
X	WBGene00004419	rpl-7A	TRUE	TRUE	TRUE	TRUE	4	FALSE	TRUE	FALSE	FALSE	TRUE	2	TRUE
I	WBGene00008944	F19B2.5	TRUE	TRUE	TRUE	TRUE	4	TRUE	FALSE	TRUE	TRUE	FALSE	2	FALSE
V	WBGene00022219	Y73B3A.18	TRUE	TRUE	TRUE	TRUE	4	FALSE	TRUE	TRUE	TRUE	FALSE	2	FALSE
X	WBGene00000755	col-182	TRUE	TRUE	TRUE	TRUE	4	FALSE	TRUE	TRUE	TRUE	FALSE	2	N/A
X	WBGene00004444	rpl-30	TRUE	TRUE	TRUE	TRUE	4	FALSE	TRUE	FALSE	FALSE	FALSE	1	TRUE
III	WBGene00006725	rps-27A	TRUE	TRUE	TRUE	TRUE	4	FALSE	TRUE	FALSE	FALSE	FALSE	1	TRUE
III	WBGene00003704	nhr-114	TRUE	TRUE	TRUE	TRUE	4	FALSE	TRUE	FALSE	FALSE	FALSE	1	FALSE
I	WBGene00017349	farl-11	TRUE	TRUE	TRUE	TRUE	4	FALSE	TRUE	FALSE	FALSE	FALSE	1	FALSE
II	WBGene00012680	Y39B6A.21	TRUE	TRUE	TRUE	TRUE	4	FALSE	TRUE	FALSE	FALSE	FALSE	1	N/A
I	WBGene00016662	C45B2.8	TRUE	TRUE	TRUE	TRUE	4	FALSE	FALSE	TRUE	TRUE	FALSE	1	N/A
X	WBGene00022951	C30E1.9	TRUE	TRUE	TRUE	TRUE	4	FALSE	TRUE	FALSE	FALSE	FALSE	1	N/A
V	WBGene00016907	C53H9.2	TRUE	FALSE	TRUE	TRUE	3	TRUE	TRUE	TRUE	TRUE	FALSE	3	TRUE
I	WBGene00004875	smd-1	TRUE	FALSE	TRUE	TRUE	3	TRUE	TRUE	TRUE	TRUE	FALSE	3	FALSE
V	WBGene00004412	rpl-10A	TRUE	FALSE	TRUE	TRUE	3	FALSE	TRUE	FALSE	FALSE	TRUE	2	TRUE
V	WBGene00017565	ddo-2	TRUE	FALSE	FALSE	TRUE	2	TRUE	TRUE	FALSE	TRUE	FALSE	2.5	FALSE
X	WBGene00004152	pqn-70	FALSE	FALSE	TRUE	TRUE	2	TRUE	TRUE	FALSE	FALSE	FALSE	2	TRUE
IV	WBGene00004424	rpl-12	FALSE	FALSE	TRUE	TRUE	2	FALSE	TRUE	FALSE	FALSE	TRUE	2	TRUE
IV	WBGene00004703	rsp-6	TRUE	TRUE	FALSE	FALSE	2	TRUE	TRUE	FALSE	FALSE	FALSE	2	TRUE
III	WBGene00011059	R06C1.4	TRUE	FALSE	FALSE	TRUE	2	TRUE	TRUE	FALSE	FALSE	FALSE	2	TRUE
IV	WBGene00016121	ift-43	FALSE	FALSE	TRUE	TRUE	2	TRUE	FALSE	TRUE	TRUE	FALSE	2	N/A
V	WBGene00004491	rps-15A	TRUE	FALSE	FALSE	TRUE	2	FALSE	TRUE	FALSE	FALSE	FALSE	1	TRUE
II	WBGene00011487	T05E12.6	TRUE	FALSE	TRUE	FALSE	2	FALSE	FALSE	TRUE	TRUE	FALSE	1	FALSE
I	WBGene00014941	Y67H2A.9	FALSE	FALSE	TRUE	TRUE	2	FALSE	TRUE	FALSE	FALSE	FALSE	1	N/A
III	WBGene00013947	ZK228.4	FALSE	FALSE	FALSE	TRUE	1	TRUE	TRUE	TRUE	TRUE	FALSE	3	TRUE
V	WBGene00019250	H28G03.2	TRUE	FALSE	FALSE	FALSE	1	TRUE	TRUE	TRUE	TRUE	FALSE	3	FALSE
V	WBGene00013560	zip-12	TRUE	FALSE	FALSE	FALSE	1	TRUE	TRUE	TRUE	TRUE	FALSE	3	N/A
V	WBGene00016496	C37C3.2	FALSE	FALSE	TRUE	FALSE	1	TRUE	TRUE	TRUE	TRUE	FALSE	3	N/A
II	WBGene00016432	C35B1.2	TRUE	FALSE	FALSE	FALSE	1	TRUE	TRUE	FALSE	TRUE	FALSE	2.5	FALSE
IV	WBGene00013763	Y113G7B.14	FALSE	FALSE	FALSE	TRUE	1	TRUE	TRUE	FALSE	FALSE	FALSE	2	N/A
III	WBGene00006910	vha-1	TRUE	FALSE	FALSE	FALSE	1	FALSE	TRUE	FALSE	FALSE	FALSE	1	UNCHECKED
V	WBGene00000191	arl-7	FALSE	FALSE	FALSE	TRUE	1	FALSE	TRUE	FALSE	FALSE	FALSE	1	N/A
III	WBGene00016027	C23H5.8	FALSE	FALSE	TRUE	FALSE	1	FALSE	FALSE	FALSE	FALSE	FALSE	0	UNCHECKED
V	WBGene00044638	F23A7.8	FALSE	FALSE	TRUE	FALSE	1	FALSE	FALSE	FALSE	FALSE	FALSE	0	UNCHECKED
I	WBGene00009957	F53B2.8	FALSE	FALSE	FALSE	FALSE	0	TRUE	TRUE	TRUE	TRUE	FALSE	3	N/A
II	WBGene00004702	rsp-5	FALSE	FALSE	FALSE	FALSE	0	TRUE	TRUE	FALSE	FALSE	FALSE	2	TRUE
V	WBGene00001725	grl-16	FALSE	FALSE	FALSE	FALSE	0	TRUE	FALSE	TRUE	TRUE	FALSE	2	FALSE
V	WBGene00006959	xbp-1	FALSE	FALSE	FALSE	FALSE	0	TRUE	FALSE	TRUE	TRUE	FALSE	2	FALSE
V	WBGene00007534	fubl-1	FALSE	FALSE	FALSE	FALSE	0	TRUE	FALSE	TRUE	TRUE	FALSE	2	FALSE
I	WBGene00019327	zip-2	FALSE	FALSE	FALSE	FALSE	0	TRUE	FALSE	TRUE	TRUE	FALSE	2	FALSE
X	WBGene00020039	R12E2.14	FALSE	FALSE	FALSE	FALSE	0	TRUE	FALSE	TRUE	TRUE	FALSE	2	FALSE
II	WBGene00000653	col-77	FALSE	FALSE	FALSE	FALSE	0	TRUE	FALSE	TRUE	TRUE	FALSE	2	N/A
V	WBGene00000748	col-175	FALSE	FALSE	FALSE	FALSE	0	TRUE	FALSE	TRUE	TRUE	FALSE	2	N/A
V	WBGene00004394	rol-1	FALSE	FALSE	FALSE	FALSE	0	TRUE	FALSE	TRUE	TRUE	FALSE	2	N/A
V	WBGene00004398	rol-8	FALSE	FALSE	FALSE	FALSE	0	TRUE	FALSE	TRUE	TRUE	FALSE	2	N/A
II	WBGene00005018	sqt-3	FALSE	FALSE	FALSE	FALSE	0	TRUE	FALSE	TRUE	TRUE	FALSE	2	N/A
I	WBGene00006927	vit-3	FALSE	FALSE	FALSE	FALSE	0	TRUE	FALSE	TRUE	TRUE	FALSE	2	N/A
X	WBGene00019236	H23N18.5	FALSE	FALSE	FALSE	FALSE	0	TRUE	FALSE	TRUE	TRUE	FALSE	2	N/A
I	WBGene00020040	R12E2.15	FALSE	FALSE	FALSE	FALSE	0	TRUE	FALSE	TRUE	TRUE	FALSE	2	N/A
III	WBGene00019301	K02D10.1	FALSE	FALSE	FALSE	FALSE	0	FALSE	TRUE	FALSE	TRUE	FALSE	1.5	FALSE
II	WBGene00000717	col-144	FALSE	FALSE	FALSE	FALSE	0	TRUE	FALSE	TRUE	FALSE	FALSE	1.5	N/A
IV	WBGene00000718	col-145	FALSE	FALSE	FALSE	FALSE	0	TRUE	FALSE	TRUE	FALSE	FALSE	1.5	N/A
IV	WBGene00006051	ssq-2	FALSE	FALSE	FALSE	FALSE	0	TRUE	FALSE	FALSE	TRUE	FALSE	1.5	N/A
IV	WBGene00000122	aly-3	FALSE	FALSE	FALSE	FALSE	0	FALSE	TRUE	FALSE	FALSE	FALSE	1	TRUE
IV	WBGene00001840	hel-1	FALSE	FALSE	FALSE	FALSE	0	FALSE	TRUE	FALSE	FALSE	FALSE	1	TRUE
III	WBGene00019537	K08D12.3	FALSE	FALSE	FALSE	FALSE	0	FALSE	TRUE	FALSE	FALSE	FALSE	1	TRUE
X	WBGene00022679	ZK180.5	FALSE	FALSE	FALSE	FALSE	0	FALSE	FALSE	TRUE	TRUE	FALSE	1	FALSE
I	WBGene00000206	asb-1	FALSE	FALSE	FALSE	FALSE	0	FALSE	FALSE	TRUE	TRUE	FALSE	1	UNCHECKED
IV	WBGene00000256	bli-6	FALSE	FALSE	FALSE	FALSE	0	FALSE	FALSE	TRUE	TRUE	FALSE	1	UNCHECKED
III	WBGene00000380	cct-5	FALSE	FALSE	FALSE	FALSE	0	FALSE	TRUE	FALSE	FALSE	FALSE	1	UNCHECKED
V	WBGene00000465	cpg-1	FALSE	FALSE	FALSE	FALSE	0	FALSE	FALSE	TRUE	TRUE	FALSE	1	UNCHECKED
V	WBGene00000473	cey-2	FALSE	FALSE	FALSE	FALSE	0	FALSE	FALSE	TRUE	TRUE	FALSE	1	UNCHECKED
I	WBGene00000474	cey-3	FALSE	FALSE	FALSE	FALSE	0	FALSE	FALSE	TRUE	TRUE	FALSE	1	UNCHECKED
IV	WBGene00000479	cgh-1	FALSE	FALSE	FALSE	FALSE	0	FALSE	FALSE	TRUE	TRUE	FALSE	1	UNCHECKED
IV	WBGene00000535	cpi-1	FALSE	FALSE	FALSE	FALSE	0	FALSE	TRUE	FALSE	FALSE	FALSE	1	UNCHECKED
I	WBGene00000594	col-3	FALSE	FALSE	FALSE	FALSE	0	FALSE	FALSE	TRUE	TRUE	FALSE	1	UNCHECKED
IV	WBGene00000599	col-10	FALSE	FALSE	FALSE	FALSE	0	FALSE	FALSE	TRUE	TRUE	FALSE	1	UNCHECKED
IV	WBGene00000603	col-14	FALSE	FALSE	FALSE	FALSE	0	FALSE	FALSE	TRUE	TRUE	FALSE	1	UNCHECKED
X	WBGene00000606	col-17	FALSE	FALSE	FALSE	FALSE	0	FALSE	FALSE	TRUE	TRUE	FALSE	1	UNCHECKED
II	WBGene00000615	col-38	FALSE	FALSE	FALSE	FALSE	0	FALSE	FALSE	TRUE	TRUE	FALSE	1	UNCHECKED
I	WBGene00000625	col-48	FALSE	FALSE	FALSE	FALSE	0	FALSE	FALSE	TRUE	TRUE	FALSE	1	UNCHECKED
IV	WBGene00000626	col-49	FALSE	FALSE	FALSE	FALSE	0	FALSE	FALSE	TRUE	TRUE	FALSE	1	UNCHECKED
I	WBGene00000636	col-60	FALSE	FALSE	FALSE	FALSE	0	FALSE	FALSE	TRUE	TRUE	FALSE	1	UNCHECKED
I	WBGene00000639	col-63	FALSE	FALSE	FALSE	FALSE	0	FALSE	FALSE	TRUE	TRUE	FALSE	1	UNCHECKED
V	WBGene00000647	col-71	FALSE	FALSE	FALSE	FALSE	0	FALSE	FALSE	TRUE	TRUE	FALSE	1	UNCHECKED
III	WBGene00000649	col-73	FALSE	FALSE	FALSE	FALSE	0	FALSE	FALSE	TRUE	TRUE	FALSE	1	UNCHECKED
V	WBGene00000657	col-81	FALSE	FALSE	FALSE	FALSE	0	TRUE	FALSE	FALSE	FALSE	FALSE	1	UNCHECKED
III	WBGene00000672	col-97	FALSE	FALSE	FALSE	FALSE	0	FALSE	FALSE	TRUE	TRUE	FALSE	1	UNCHECKED
IV	WBGene00000678	col-104	FALSE	FALSE	FALSE	FALSE	0	FALSE	FALSE	TRUE	TRUE	FALSE	1	UNCHECKED
II	WBGene00000683	col-109	FALSE	FALSE	FALSE	FALSE	0	FALSE	FALSE	TRUE	TRUE	FALSE	1	UNCHECKED
III	WBGene00000691	col-117	FALSE	FALSE	FALSE	FALSE	0	FALSE	FALSE	TRUE	TRUE	FALSE	1	UNCHECKED
V	WBGene00000694	col-120	FALSE	FALSE	FALSE	FALSE	0	FALSE	FALSE	TRUE	TRUE	FALSE	1	UNCHECKED
III	WBGene00000703	col-129	FALSE	FALSE	FALSE	FALSE	0	TRUE	FALSE	FALSE	FALSE	FALSE	1	UNCHECKED
I	WBGene00000704	col-130	FALSE	FALSE	FALSE	FALSE	0	FALSE	FALSE	TRUE	TRUE	FALSE	1	UNCHECKED
X	WBGene00000716	col-143	FALSE	FALSE	FALSE	FALSE	0	FALSE	FALSE	TRUE	TRUE	FALSE	1	UNCHECKED
II	WBGene00000727	col-154	FALSE	FALSE	FALSE	FALSE	0	FALSE	FALSE	TRUE	TRUE	FALSE	1	UNCHECKED
V	WBGene00000730	col-157	FALSE	FALSE	FALSE	FALSE	0	FALSE	FALSE	TRUE	TRUE	FALSE	1	UNCHECKED
I	WBGene00000865	cyb-1	FALSE	FALSE	FALSE	FALSE	0	FALSE	FALSE	TRUE	TRUE	FALSE	1	UNCHECKED
V	WBGene00000928	dao-2	FALSE	FALSE	FALSE	FALSE	0	FALSE	FALSE	TRUE	TRUE	FALSE	1	UNCHECKED
I	WBGene00001066	dpy-4	FALSE	FALSE	FALSE	FALSE	0	FALSE	FALSE	TRUE	TRUE	FALSE	1	UNCHECKED
IV	WBGene00001067	dpy-5	FALSE	FALSE	FALSE	FALSE	0	FALSE	FALSE	TRUE	TRUE	FALSE	1	UNCHECKED
IV	WBGene00001073	dpy-11	FALSE	FALSE	FALSE	FALSE	0	FALSE	FALSE	TRUE	TRUE	FALSE	1	UNCHECKED
IV	WBGene00001074	dpy-13	FALSE	FALSE	FALSE	FALSE	0	FALSE	FALSE	TRUE	TRUE	FALSE	1	UNCHECKED
IV	WBGene00001423	fib-1	FALSE	FALSE	FALSE	FALSE	0	FALSE	TRUE	FALSE	FALSE	FALSE	1	UNCHECKED
IV	WBGene00001595	gld-1	FALSE	FALSE	FALSE	FALSE	0	FALSE	FALSE	TRUE	TRUE	FALSE	1	UNCHECKED
X	WBGene00001703	grd-14	FALSE	FALSE	FALSE	FALSE	0	FALSE	FALSE	TRUE	TRUE	FALSE	1	UNCHECKED
IV	WBGene00001855	hil-4	FALSE	FALSE	FALSE	FALSE	0	FALSE	FALSE	TRUE	TRUE	FALSE	1	UNCHECKED
I	WBGene00001856	hil-5	FALSE	FALSE	FALSE	FALSE	0	FALSE	FALSE	TRUE	TRUE	FALSE	1	UNCHECKED
X	WBGene00001999	hrpa-1	FALSE	FALSE	FALSE	FALSE	0	FALSE	TRUE	FALSE	FALSE	FALSE	1	UNCHECKED
IV	WBGene00002000	hrpr-1	FALSE	FALSE	FALSE	FALSE	0	FALSE	TRUE	FALSE	FALSE	FALSE	1	UNCHECKED
III	WBGene00002056	ifc-2	FALSE	FALSE	FALSE	FALSE	0	TRUE	FALSE	FALSE	FALSE	FALSE	1	UNCHECKED
IV	WBGene00002073	ima-2	FALSE	FALSE	FALSE	FALSE	0	FALSE	FALSE	TRUE	TRUE	FALSE	1	UNCHECKED
IV	WBGene00002183	kat-1	FALSE	FALSE	FALSE	FALSE	0	FALSE	TRUE	FALSE	FALSE	FALSE	1	UNCHECKED
III	WBGene00002280	let-2	FALSE	FALSE	FALSE	FALSE	0	TRUE	FALSE	FALSE	FALSE	FALSE	1	UNCHECKED
IV	WBGene00003091	lys-2	FALSE	FALSE	FALSE	FALSE	0	FALSE	TRUE	FALSE	FALSE	FALSE	1	UNCHECKED
IV	WBGene00003458	msp-65	FALSE	FALSE	FALSE	FALSE	0	FALSE	FALSE	TRUE	TRUE	FALSE	1	UNCHECKED
IV	WBGene00003771	nlp-33	FALSE	FALSE	FALSE	FALSE	0	FALSE	FALSE	TRUE	TRUE	FALSE	1	UNCHECKED
X	WBGene00003914	pam-1	FALSE	FALSE	FALSE	FALSE	0	FALSE	TRUE	FALSE	FALSE	FALSE	1	UNCHECKED
IV	WBGene00003934	pat-10	FALSE	FALSE	FALSE	FALSE	0	TRUE	FALSE	FALSE	FALSE	FALSE	1	UNCHECKED
X	WBGene00003955	pcn-1	FALSE	FALSE	FALSE	FALSE	0	FALSE	FALSE	TRUE	TRUE	FALSE	1	UNCHECKED
V	WBGene00003992	pgl-1	FALSE	FALSE	FALSE	FALSE	0	FALSE	FALSE	TRUE	TRUE	FALSE	1	UNCHECKED
V	WBGene00004132	ifet-1	FALSE	FALSE	FALSE	FALSE	0	FALSE	FALSE	TRUE	TRUE	FALSE	1	UNCHECKED
IV	WBGene00004410	rplp-2.2	FALSE	FALSE	FALSE	FALSE	0	TRUE	FALSE	FALSE	FALSE	FALSE	1	UNCHECKED
X	WBGene00004447	rpl-35A	FALSE	FALSE	FALSE	FALSE	0	TRUE	FALSE	FALSE	FALSE	FALSE	1	UNCHECKED
III	WBGene00005016	sqt-1	FALSE	FALSE	FALSE	FALSE	0	FALSE	FALSE	TRUE	TRUE	FALSE	1	UNCHECKED
IV	WBGene00005017	sqt-2	FALSE	FALSE	FALSE	FALSE	0	FALSE	FALSE	TRUE	TRUE	FALSE	1	UNCHECKED
V	WBGene00006789	unc-54	FALSE	FALSE	FALSE	FALSE	0	TRUE	FALSE	FALSE	FALSE	FALSE	1	UNCHECKED
IV	WBGene00006920	vha-11	FALSE	FALSE	FALSE	FALSE	0	FALSE	TRUE	FALSE	FALSE	FALSE	1	UNCHECKED
IV	WBGene00006925	vit-1	FALSE	FALSE	FALSE	FALSE	0	FALSE	FALSE	TRUE	TRUE	FALSE	1	UNCHECKED
IV	WBGene00006926	vit-2	FALSE	FALSE	FALSE	FALSE	0	FALSE	FALSE	TRUE	TRUE	FALSE	1	UNCHECKED
X	WBGene00006928	vit-4	FALSE	FALSE	FALSE	FALSE	0	FALSE	FALSE	TRUE	TRUE	FALSE	1	UNCHECKED
V	WBGene00006929	vit-5	FALSE	FALSE	FALSE	FALSE	0	FALSE	FALSE	TRUE	TRUE	FALSE	1	UNCHECKED
III	WBGene00006930	vit-6	FALSE	FALSE	FALSE	FALSE	0	FALSE	FALSE	TRUE	TRUE	FALSE	1	UNCHECKED
IV	WBGene00007709	clec-87	FALSE	FALSE	FALSE	FALSE	0	FALSE	FALSE	TRUE	TRUE	FALSE	1	UNCHECKED
IV	WBGene00008194	C49C3.4	FALSE	FALSE	FALSE	FALSE	0	FALSE	TRUE	FALSE	FALSE	FALSE	1	UNCHECKED
IV	WBGene00008356	nspc-20	FALSE	FALSE	FALSE	FALSE	0	TRUE	FALSE	FALSE	FALSE	FALSE	1	UNCHECKED
X	WBGene00008448	E01G4.6	FALSE	FALSE	FALSE	FALSE	0	FALSE	FALSE	TRUE	TRUE	FALSE	1	UNCHECKED
V	WBGene00008920	eef-1G	FALSE	FALSE	FALSE	FALSE	0	FALSE	TRUE	FALSE	FALSE	FALSE	1	UNCHECKED
III	WBGene00009982	F53F1.4	FALSE	FALSE	FALSE	FALSE	0	FALSE	FALSE	TRUE	TRUE	FALSE	1	UNCHECKED
II	WBGene00009983	cut-2	FALSE	FALSE	FALSE	FALSE	0	FALSE	FALSE	TRUE	TRUE	FALSE	1	UNCHECKED
IV	WBGene00010260	ddx-17	FALSE	FALSE	FALSE	FALSE	0	FALSE	TRUE	FALSE	FALSE	FALSE	1	UNCHECKED
IV	WBGene00010351	cbd-1	FALSE	FALSE	FALSE	FALSE	0	FALSE	FALSE	TRUE	TRUE	FALSE	1	UNCHECKED
V	WBGene00010605	K06G5.1	FALSE	FALSE	FALSE	FALSE	0	FALSE	TRUE	FALSE	FALSE	FALSE	1	UNCHECKED
I	WBGene00011061	wago-1	FALSE	FALSE	FALSE	FALSE	0	FALSE	FALSE	TRUE	TRUE	FALSE	1	UNCHECKED
I	WBGene00011155	rbm-3.1	FALSE	FALSE	FALSE	FALSE	0	FALSE	FALSE	TRUE	TRUE	FALSE	1	UNCHECKED
IV	WBGene00011156	rbm-3.2	FALSE	FALSE	FALSE	FALSE	0	TRUE	FALSE	FALSE	FALSE	FALSE	1	UNCHECKED
I	WBGene00012484	car-1	FALSE	FALSE	FALSE	FALSE	0	FALSE	FALSE	TRUE	TRUE	FALSE	1	UNCHECKED
V	WBGene00013263	txdc-12.1	FALSE	FALSE	FALSE	FALSE	0	FALSE	FALSE	TRUE	TRUE	FALSE	1	UNCHECKED
V	WBGene00014244	ZK1307.1	FALSE	FALSE	FALSE	FALSE	0	FALSE	FALSE	TRUE	TRUE	FALSE	1	UNCHECKED
II	WBGene00015102	cpg-2	FALSE	FALSE	FALSE	FALSE	0	FALSE	FALSE	TRUE	TRUE	FALSE	1	UNCHECKED
IV	WBGene00015339	C02E7.6	FALSE	FALSE	FALSE	FALSE	0	FALSE	FALSE	TRUE	TRUE	FALSE	1	UNCHECKED
V	WBGene00015340	C02E7.7	FALSE	FALSE	FALSE	FALSE	0	FALSE	FALSE	TRUE	TRUE	FALSE	1	UNCHECKED
III	WBGene00016636	perm-2	FALSE	FALSE	FALSE	FALSE	0	FALSE	FALSE	TRUE	TRUE	FALSE	1	UNCHECKED
II	WBGene00016638	perm-4	FALSE	FALSE	FALSE	FALSE	0	FALSE	FALSE	TRUE	TRUE	FALSE	1	UNCHECKED
I	WBGene00018297	F41F3.3	FALSE	FALSE	FALSE	FALSE	0	FALSE	FALSE	TRUE	TRUE	FALSE	1	UNCHECKED
IV	WBGene00019261	H34I24.2	FALSE	FALSE	FALSE	FALSE	0	TRUE	FALSE	FALSE	FALSE	FALSE	1	UNCHECKED
IV	WBGene00019540	epic-2	FALSE	FALSE	FALSE	FALSE	0	FALSE	FALSE	TRUE	TRUE	FALSE	1	UNCHECKED
I	WBGene00019947	htz-1	FALSE	FALSE	FALSE	FALSE	0	FALSE	FALSE	TRUE	TRUE	FALSE	1	UNCHECKED
V	WBGene00020033	R12E2.7	FALSE	FALSE	FALSE	FALSE	0	FALSE	FALSE	TRUE	TRUE	FALSE	1	UNCHECKED
V	WBGene00020588	T19H12.2	FALSE	FALSE	FALSE	FALSE	0	FALSE	FALSE	TRUE	TRUE	FALSE	1	UNCHECKED
IV	WBGene00020840	spch-3	FALSE	FALSE	FALSE	FALSE	0	TRUE	FALSE	FALSE	FALSE	FALSE	1	UNCHECKED
X	WBGene00020950	dlst-1	FALSE	FALSE	FALSE	FALSE	0	FALSE	FALSE	TRUE	TRUE	FALSE	1	UNCHECKED
II	WBGene00021627	Y47D7A.15	FALSE	FALSE	FALSE	FALSE	0	FALSE	FALSE	TRUE	TRUE	FALSE	1	UNCHECKED
I	WBGene00021641	Y47G6A.15	FALSE	FALSE	FALSE	FALSE	0	FALSE	FALSE	TRUE	TRUE	FALSE	1	UNCHECKED
IV	WBGene00021690	Y48G8AL.12	FALSE	FALSE	FALSE	FALSE	0	FALSE	FALSE	TRUE	TRUE	FALSE	1	UNCHECKED
II	WBGene00021791	Y51H7C.13	FALSE	FALSE	FALSE	FALSE	0	FALSE	FALSE	TRUE	TRUE	FALSE	1	UNCHECKED
IV	WBGene00021930	Y55F3AM.13	FALSE	FALSE	FALSE	FALSE	0	FALSE	TRUE	FALSE	FALSE	FALSE	1	UNCHECKED
IV	WBGene00022382	Y94H6A.10	FALSE	FALSE	FALSE	FALSE	0	FALSE	FALSE	TRUE	TRUE	FALSE	1	N/A
II	WBGene00044109	K02E11.10	FALSE	FALSE	FALSE	FALSE	0	FALSE	FALSE	TRUE	TRUE	FALSE	1	N/A
II	WBGene00044724	R02E4.3	FALSE	FALSE	FALSE	FALSE	0	FALSE	FALSE	TRUE	TRUE	FALSE	1	N/A
V	WBGene00000663	col-88	FALSE	FALSE	FALSE	FALSE	0	FALSE	FALSE	TRUE	FALSE	FALSE	0.5	UNCHECKED
IV	WBGene00000666	col-91	FALSE	FALSE	FALSE	FALSE	0	FALSE	FALSE	TRUE	FALSE	FALSE	0.5	UNCHECKED
I	WBGene00000693	col-119	FALSE	FALSE	FALSE	FALSE	0	FALSE	FALSE	TRUE	FALSE	FALSE	0.5	UNCHECKED
II	WBGene00000734	col-161	FALSE	FALSE	FALSE	FALSE	0	FALSE	FALSE	TRUE	FALSE	FALSE	0.5	UNCHECKED
IV	WBGene00000735	col-162	FALSE	FALSE	FALSE	FALSE	0	FALSE	FALSE	TRUE	FALSE	FALSE	0.5	UNCHECKED
IV	WBGene00000741	col-168	FALSE	FALSE	FALSE	FALSE	0	FALSE	FALSE	TRUE	FALSE	FALSE	0.5	UNCHECKED
X	WBGene00001598	glh-1	FALSE	FALSE	FALSE	FALSE	0	FALSE	FALSE	FALSE	TRUE	FALSE	0.5	UNCHECKED
I	WBGene00003444	msp-51	FALSE	FALSE	FALSE	FALSE	0	FALSE	FALSE	FALSE	TRUE	FALSE	0.5	UNCHECKED
I	WBGene00003446	msp-53	FALSE	FALSE	FALSE	FALSE	0	FALSE	FALSE	FALSE	TRUE	FALSE	0.5	UNCHECKED
V	WBGene00003448	msp-55	FALSE	FALSE	FALSE	FALSE	0	FALSE	FALSE	FALSE	TRUE	FALSE	0.5	UNCHECKED
V	WBGene00003450	msp-57	FALSE	FALSE	FALSE	FALSE	0	FALSE	FALSE	FALSE	TRUE	FALSE	0.5	UNCHECKED
X	WBGene00003463	msp-76	FALSE	FALSE	FALSE	FALSE	0	FALSE	FALSE	FALSE	TRUE	FALSE	0.5	UNCHECKED
X	WBGene00004422	rpl-11.1	FALSE	FALSE	FALSE	FALSE	0	FALSE	FALSE	FALSE	TRUE	FALSE	0.5	UNCHECKED
V	WBGene00006050	ssq-1	FALSE	FALSE	FALSE	FALSE	0	FALSE	FALSE	FALSE	TRUE	FALSE	0.5	UNCHECKED
I	WBGene00007969	acs-19	FALSE	FALSE	FALSE	FALSE	0	FALSE	FALSE	FALSE	TRUE	FALSE	0.5	UNCHECKED
V	WBGene00008377	D1054.10	FALSE	FALSE	FALSE	FALSE	0	FALSE	FALSE	TRUE	FALSE	FALSE	0.5	UNCHECKED
X	WBGene00009995	spig-9	FALSE	FALSE	FALSE	FALSE	0	FALSE	FALSE	FALSE	TRUE	FALSE	0.5	UNCHECKED
III	WBGene00010478	dkc-1	FALSE	FALSE	FALSE	FALSE	0	FALSE	FALSE	FALSE	TRUE	FALSE	0.5	UNCHECKED
I	WBGene00010677	gtbp-1	FALSE	FALSE	FALSE	FALSE	0	FALSE	FALSE	FALSE	TRUE	FALSE	0.5	UNCHECKED
V	WBGene00011753	T13F3.6	FALSE	FALSE	FALSE	FALSE	0	FALSE	FALSE	TRUE	FALSE	FALSE	0.5	UNCHECKED
I	WBGene00013766	prmt-1	FALSE	FALSE	FALSE	FALSE	0	FALSE	FALSE	FALSE	TRUE	FALSE	0.5	UNCHECKED
V	WBGene00015791	bbln-1	FALSE	FALSE	FALSE	FALSE	0	FALSE	FALSE	TRUE	FALSE	FALSE	0.5	UNCHECKED
X	WBGene00016659	C45B2.2	FALSE	FALSE	FALSE	FALSE	0	FALSE	FALSE	TRUE	FALSE	FALSE	0.5	UNCHECKED
II	WBGene00017892	F28B4.3	FALSE	FALSE	FALSE	FALSE	0	FALSE	FALSE	FALSE	TRUE	FALSE	0.5	UNCHECKED
V	WBGene00019510	nucl-1	FALSE	FALSE	FALSE	FALSE	0	FALSE	FALSE	FALSE	TRUE	FALSE	0.5	UNCHECKED
X	WBGene00021625	Y47D7A.13	FALSE	FALSE	FALSE	FALSE	0	FALSE	FALSE	TRUE	FALSE	FALSE	0.5	UNCHECKED
II	WBGene00022046	garr-1	FALSE	FALSE	FALSE	FALSE	0	FALSE	FALSE	FALSE	TRUE	FALSE	0.5	UNCHECKED
II	WBGene00004440	rpl-26	FALSE	FALSE	FALSE	FALSE	0	FALSE	FALSE	FALSE	FALSE	FALSE	0	TRUE
X	WBGene00000040	aco-1	FALSE	FALSE	FALSE	FALSE	0	FALSE	FALSE	FALSE	FALSE	FALSE	0	UNCHECKED
V	WBGene00000063	act-1	FALSE	FALSE	FALSE	FALSE	0	FALSE	FALSE	FALSE	FALSE	FALSE	0	UNCHECKED
V	WBGene00000064	act-2	FALSE	FALSE	FALSE	FALSE	0	FALSE	FALSE	FALSE	FALSE	FALSE	0	UNCHECKED
V	WBGene00000065	act-3	FALSE	FALSE	FALSE	FALSE	0	FALSE	FALSE	FALSE	FALSE	FALSE	0	UNCHECKED
X	WBGene00000066	act-4	FALSE	FALSE	FALSE	FALSE	0	FALSE	FALSE	FALSE	FALSE	FALSE	0	UNCHECKED
III	WBGene00000067	act-5	FALSE	FALSE	FALSE	FALSE	0	FALSE	FALSE	FALSE	FALSE	FALSE	0	UNCHECKED
III	WBGene00000081	ads-1	FALSE	FALSE	FALSE	FALSE	0	FALSE	FALSE	FALSE	FALSE	FALSE	0	UNCHECKED
III	WBGene00000107	alh-1	FALSE	FALSE	FALSE	FALSE	0	FALSE	FALSE	FALSE	FALSE	FALSE	0	UNCHECKED
X	WBGene00000175	aqp-7	FALSE	FALSE	FALSE	FALSE	0	FALSE	FALSE	FALSE	FALSE	FALSE	0	UNCHECKED
IV	WBGene00000181	ard-1	FALSE	FALSE	FALSE	FALSE	0	FALSE	FALSE	FALSE	FALSE	FALSE	0	UNCHECKED
III	WBGene00000182	arf-1	FALSE	FALSE	FALSE	FALSE	0	FALSE	FALSE	FALSE	FALSE	FALSE	0	UNCHECKED
II	WBGene00000198	art-1	FALSE	FALSE	FALSE	FALSE	0	FALSE	FALSE	FALSE	FALSE	FALSE	0	UNCHECKED
X	WBGene00000207	asb-2	FALSE	FALSE	FALSE	FALSE	0	FALSE	FALSE	FALSE	FALSE	FALSE	0	UNCHECKED
X	WBGene00000210	asg-2	FALSE	FALSE	FALSE	FALSE	0	FALSE	FALSE	FALSE	FALSE	FALSE	0	UNCHECKED
V	WBGene00000214	asp-1	FALSE	FALSE	FALSE	FALSE	0	FALSE	FALSE	FALSE	FALSE	FALSE	0	UNCHECKED
V	WBGene00000215	asp-2	FALSE	FALSE	FALSE	FALSE	0	FALSE	FALSE	FALSE	FALSE	FALSE	0	UNCHECKED
X	WBGene00000216	asp-3	FALSE	FALSE	FALSE	FALSE	0	FALSE	FALSE	FALSE	FALSE	FALSE	0	UNCHECKED
V	WBGene00000218	asp-5	FALSE	FALSE	FALSE	FALSE	0	FALSE	FALSE	FALSE	FALSE	FALSE	0	UNCHECKED
V	WBGene00000219	asp-6	FALSE	FALSE	FALSE	FALSE	0	FALSE	FALSE	FALSE	FALSE	FALSE	0	UNCHECKED
III	WBGene00000229	atp-2	FALSE	FALSE	FALSE	FALSE	0	FALSE	FALSE	FALSE	FALSE	FALSE	0	UNCHECKED
I	WBGene00000230	atp-3	FALSE	FALSE	FALSE	FALSE	0	FALSE	FALSE	FALSE	FALSE	FALSE	0	UNCHECKED
III	WBGene00000235	baf-1	FALSE	FALSE	FALSE	FALSE	0	FALSE	FALSE	FALSE	FALSE	FALSE	0	UNCHECKED
III	WBGene00000263	F23H11.5	FALSE	FALSE	FALSE	FALSE	0	FALSE	FALSE	FALSE	FALSE	FALSE	0	UNCHECKED
III	WBGene00000273	brp-1	FALSE	FALSE	FALSE	FALSE	0	FALSE	FALSE	FALSE	FALSE	FALSE	0	UNCHECKED
X	WBGene00000282	cah-4	FALSE	FALSE	FALSE	FALSE	0	FALSE	FALSE	FALSE	FALSE	FALSE	0	UNCHECKED
I	WBGene00000371	cox-5B	FALSE	FALSE	FALSE	FALSE	0	FALSE	FALSE	FALSE	FALSE	FALSE	0	UNCHECKED
II	WBGene00000377	cct-1	FALSE	FALSE	FALSE	FALSE	0	FALSE	FALSE	FALSE	FALSE	FALSE	0	UNCHECKED
II	WBGene00000378	cct-2	FALSE	FALSE	FALSE	FALSE	0	FALSE	FALSE	FALSE	FALSE	FALSE	0	UNCHECKED
II	WBGene00000379	cct-4	FALSE	FALSE	FALSE	FALSE	0	FALSE	FALSE	FALSE	FALSE	FALSE	0	UNCHECKED
III	WBGene00000381	cct-6	FALSE	FALSE	FALSE	FALSE	0	FALSE	FALSE	FALSE	FALSE	FALSE	0	UNCHECKED
V	WBGene00000552	cmd-1	FALSE	FALSE	FALSE	FALSE	0	FALSE	FALSE	FALSE	FALSE	FALSE	0	UNCHECKED
I	WBGene00000596	col-7	FALSE	FALSE	FALSE	FALSE	0	FALSE	FALSE	FALSE	FALSE	FALSE	0	UNCHECKED
V	WBGene00000601	col-12	FALSE	FALSE	FALSE	FALSE	0	FALSE	FALSE	FALSE	FALSE	FALSE	0	UNCHECKED
V	WBGene00000602	col-13	FALSE	FALSE	FALSE	FALSE	0	FALSE	FALSE	FALSE	FALSE	FALSE	0	UNCHECKED
X	WBGene00000608	col-19	FALSE	FALSE	FALSE	FALSE	0	FALSE	FALSE	FALSE	FALSE	FALSE	0	UNCHECKED
II	WBGene00000609	col-20	FALSE	FALSE	FALSE	FALSE	0	FALSE	FALSE	FALSE	FALSE	FALSE	0	UNCHECKED
II	WBGene00000616	col-39	FALSE	FALSE	FALSE	FALSE	0	FALSE	FALSE	FALSE	FALSE	FALSE	0	UNCHECKED
I	WBGene00000638	col-62	FALSE	FALSE	FALSE	FALSE	0	FALSE	FALSE	FALSE	FALSE	FALSE	0	UNCHECKED
II	WBGene00000656	col-80	FALSE	FALSE	FALSE	FALSE	0	FALSE	FALSE	FALSE	FALSE	FALSE	0	UNCHECKED
III	WBGene00000667	col-92	FALSE	FALSE	FALSE	FALSE	0	FALSE	FALSE	FALSE	FALSE	FALSE	0	UNCHECKED
III	WBGene00000668	col-93	FALSE	FALSE	FALSE	FALSE	0	FALSE	FALSE	FALSE	FALSE	FALSE	0	UNCHECKED
III	WBGene00000669	col-94	FALSE	FALSE	FALSE	FALSE	0	FALSE	FALSE	FALSE	FALSE	FALSE	0	UNCHECKED
III	WBGene00000673	col-98	FALSE	FALSE	FALSE	FALSE	0	FALSE	FALSE	FALSE	FALSE	FALSE	0	UNCHECKED
IV	WBGene00000677	col-103	FALSE	FALSE	FALSE	FALSE	0	FALSE	FALSE	FALSE	FALSE	FALSE	0	UNCHECKED
IV	WBGene00000680	col-106	FALSE	FALSE	FALSE	FALSE	0	FALSE	FALSE	FALSE	FALSE	FALSE	0	UNCHECKED
IV	WBGene00000696	col-122	FALSE	FALSE	FALSE	FALSE	0	FALSE	FALSE	FALSE	FALSE	FALSE	0	UNCHECKED
IV	WBGene00000698	col-124	FALSE	FALSE	FALSE	FALSE	0	FALSE	FALSE	FALSE	FALSE	FALSE	0	UNCHECKED
IV	WBGene00000707	col-133	FALSE	FALSE	FALSE	FALSE	0	FALSE	FALSE	FALSE	FALSE	FALSE	0	UNCHECKED
V	WBGene00000712	col-139	FALSE	FALSE	FALSE	FALSE	0	FALSE	FALSE	FALSE	FALSE	FALSE	0	UNCHECKED
V	WBGene00000713	col-140	FALSE	FALSE	FALSE	FALSE	0	FALSE	FALSE	FALSE	FALSE	FALSE	0	UNCHECKED
V	WBGene00000715	col-142	FALSE	FALSE	FALSE	FALSE	0	FALSE	FALSE	FALSE	FALSE	FALSE	0	UNCHECKED
V	WBGene00000719	col-146	FALSE	FALSE	FALSE	FALSE	0	FALSE	FALSE	FALSE	FALSE	FALSE	0	UNCHECKED
V	WBGene00000720	col-147	FALSE	FALSE	FALSE	FALSE	0	FALSE	FALSE	FALSE	FALSE	FALSE	0	UNCHECKED
V	WBGene00000728	col-155	FALSE	FALSE	FALSE	FALSE	0	FALSE	FALSE	FALSE	FALSE	FALSE	0	UNCHECKED
V	WBGene00000732	col-159	FALSE	FALSE	FALSE	FALSE	0	FALSE	FALSE	FALSE	FALSE	FALSE	0	UNCHECKED
V	WBGene00000733	col-160	FALSE	FALSE	FALSE	FALSE	0	FALSE	FALSE	FALSE	FALSE	FALSE	0	UNCHECKED
X	WBGene00000739	col-166	FALSE	FALSE	FALSE	FALSE	0	FALSE	FALSE	FALSE	FALSE	FALSE	0	UNCHECKED
X	WBGene00000740	col-167	FALSE	FALSE	FALSE	FALSE	0	FALSE	FALSE	FALSE	FALSE	FALSE	0	UNCHECKED
X	WBGene00000751	col-178	FALSE	FALSE	FALSE	FALSE	0	FALSE	FALSE	FALSE	FALSE	FALSE	0	UNCHECKED
X	WBGene00000754	col-181	FALSE	FALSE	FALSE	FALSE	0	FALSE	FALSE	FALSE	FALSE	FALSE	0	UNCHECKED
X	WBGene00000757	col-184	FALSE	FALSE	FALSE	FALSE	0	FALSE	FALSE	FALSE	FALSE	FALSE	0	UNCHECKED
V	WBGene00000776	cpl-1	FALSE	FALSE	FALSE	FALSE	0	FALSE	FALSE	FALSE	FALSE	FALSE	0	UNCHECKED
I	WBGene00000777	cpn-1	FALSE	FALSE	FALSE	FALSE	0	FALSE	FALSE	FALSE	FALSE	FALSE	0	UNCHECKED
I	WBGene00000779	cpn-3	FALSE	FALSE	FALSE	FALSE	0	FALSE	FALSE	FALSE	FALSE	FALSE	0	UNCHECKED
V	WBGene00000785	cpr-5	FALSE	FALSE	FALSE	FALSE	0	FALSE	FALSE	FALSE	FALSE	FALSE	0	UNCHECKED
X	WBGene00000786	cpr-6	FALSE	FALSE	FALSE	FALSE	0	FALSE	FALSE	FALSE	FALSE	FALSE	0	UNCHECKED
I	WBGene00000788	cpz-1	FALSE	FALSE	FALSE	FALSE	0	FALSE	FALSE	FALSE	FALSE	FALSE	0	UNCHECKED
X	WBGene00000822	csq-1	FALSE	FALSE	FALSE	FALSE	0	FALSE	FALSE	FALSE	FALSE	FALSE	0	UNCHECKED
III	WBGene00000833	cts-1	FALSE	FALSE	FALSE	FALSE	0	FALSE	FALSE	FALSE	FALSE	FALSE	0	UNCHECKED
III	WBGene00000835	cuc-1	FALSE	FALSE	FALSE	FALSE	0	FALSE	FALSE	FALSE	FALSE	FALSE	0	UNCHECKED
V	WBGene00000877	cyn-1	FALSE	FALSE	FALSE	FALSE	0	FALSE	FALSE	FALSE	FALSE	FALSE	0	UNCHECKED
V	WBGene00000879	cyn-3	FALSE	FALSE	FALSE	FALSE	0	FALSE	FALSE	FALSE	FALSE	FALSE	0	UNCHECKED
V	WBGene00000883	cyn-7	FALSE	FALSE	FALSE	FALSE	0	FALSE	FALSE	FALSE	FALSE	FALSE	0	UNCHECKED
I	WBGene00000896	dad-1	FALSE	FALSE	FALSE	FALSE	0	FALSE	FALSE	FALSE	FALSE	FALSE	0	UNCHECKED
V	WBGene00000915	hsp-90	FALSE	FALSE	FALSE	FALSE	0	FALSE	FALSE	FALSE	FALSE	FALSE	0	UNCHECKED
III	WBGene00000941	ddp-1	FALSE	FALSE	FALSE	FALSE	0	FALSE	FALSE	FALSE	FALSE	FALSE	0	UNCHECKED
X	WBGene00000988	dhs-25	FALSE	FALSE	FALSE	FALSE	0	FALSE	FALSE	FALSE	FALSE	FALSE	0	UNCHECKED
X	WBGene00001000	dim-1	FALSE	FALSE	FALSE	FALSE	0	FALSE	FALSE	FALSE	FALSE	FALSE	0	UNCHECKED
III	WBGene00001005	dlc-1	FALSE	FALSE	FALSE	FALSE	0	FALSE	FALSE	FALSE	FALSE	FALSE	0	UNCHECKED
V	WBGene00001037	dnj-19	FALSE	FALSE	FALSE	FALSE	0	FALSE	FALSE	FALSE	FALSE	FALSE	0	UNCHECKED
II	WBGene00001038	dnj-20	FALSE	FALSE	FALSE	FALSE	0	FALSE	FALSE	FALSE	FALSE	FALSE	0	UNCHECKED
V	WBGene00001088	dpy-30	FALSE	FALSE	FALSE	FALSE	0	FALSE	FALSE	FALSE	FALSE	FALSE	0	UNCHECKED
V	WBGene00001137	eat-6	FALSE	FALSE	FALSE	FALSE	0	FALSE	FALSE	FALSE	FALSE	FALSE	0	UNCHECKED
III	WBGene00001155	ech-6	FALSE	FALSE	FALSE	FALSE	0	FALSE	FALSE	FALSE	FALSE	FALSE	0	UNCHECKED
I	WBGene00001167	eef-2	FALSE	FALSE	FALSE	FALSE	0	FALSE	FALSE	FALSE	FALSE	FALSE	0	UNCHECKED
III	WBGene00001168	eef-1A.1	FALSE	FALSE	FALSE	FALSE	0	FALSE	FALSE	FALSE	FALSE	FALSE	0	UNCHECKED
X	WBGene00001169	eef-1A.2	FALSE	FALSE	FALSE	FALSE	0	FALSE	FALSE	FALSE	FALSE	FALSE	0	UNCHECKED
III	WBGene00001209	egl-45	FALSE	FALSE	FALSE	FALSE	0	FALSE	FALSE	FALSE	FALSE	FALSE	0	UNCHECKED
I	WBGene00001226	eif-3.C	FALSE	FALSE	FALSE	FALSE	0	FALSE	FALSE	FALSE	FALSE	FALSE	0	UNCHECKED
II	WBGene00001229	eif-3.F	FALSE	FALSE	FALSE	FALSE	0	FALSE	FALSE	FALSE	FALSE	FALSE	0	UNCHECKED
I	WBGene00001234	eif-6	FALSE	FALSE	FALSE	FALSE	0	FALSE	FALSE	FALSE	FALSE	FALSE	0	UNCHECKED
IV	WBGene00001239	elo-1	FALSE	FALSE	FALSE	FALSE	0	FALSE	FALSE	FALSE	FALSE	FALSE	0	UNCHECKED
IV	WBGene00001240	elo-2	FALSE	FALSE	FALSE	FALSE	0	FALSE	FALSE	FALSE	FALSE	FALSE	0	UNCHECKED
IV	WBGene00001244	elo-6	FALSE	FALSE	FALSE	FALSE	0	FALSE	FALSE	FALSE	FALSE	FALSE	0	UNCHECKED
III	WBGene00001263	emb-9	FALSE	FALSE	FALSE	FALSE	0	FALSE	FALSE	FALSE	FALSE	FALSE	0	UNCHECKED
V	WBGene00001303	sec-61.G	FALSE	FALSE	FALSE	FALSE	0	FALSE	FALSE	FALSE	FALSE	FALSE	0	UNCHECKED
I	WBGene00001333	erm-1	FALSE	FALSE	FALSE	FALSE	0	FALSE	FALSE	FALSE	FALSE	FALSE	0	UNCHECKED
IV	WBGene00001336	qars-1	FALSE	FALSE	FALSE	FALSE	0	FALSE	FALSE	FALSE	FALSE	FALSE	0	UNCHECKED
I	WBGene00001337	ears-1	FALSE	FALSE	FALSE	FALSE	0	FALSE	FALSE	FALSE	FALSE	FALSE	0	UNCHECKED
III	WBGene00001385	far-1	FALSE	FALSE	FALSE	FALSE	0	FALSE	FALSE	FALSE	FALSE	FALSE	0	UNCHECKED
III	WBGene00001386	far-2	FALSE	FALSE	FALSE	FALSE	0	FALSE	FALSE	FALSE	FALSE	FALSE	0	UNCHECKED
IV	WBGene00001393	fat-1	FALSE	FALSE	FALSE	FALSE	0	FALSE	FALSE	FALSE	FALSE	FALSE	0	UNCHECKED
IV	WBGene00001394	fat-2	FALSE	FALSE	FALSE	FALSE	0	FALSE	FALSE	FALSE	FALSE	FALSE	0	UNCHECKED
IV	WBGene00001396	fat-4	FALSE	FALSE	FALSE	FALSE	0	FALSE	FALSE	FALSE	FALSE	FALSE	0	UNCHECKED
IV	WBGene00001398	fat-6	FALSE	FALSE	FALSE	FALSE	0	FALSE	FALSE	FALSE	FALSE	FALSE	0	UNCHECKED
IV	WBGene00001426	fkb-1	FALSE	FALSE	FALSE	FALSE	0	FALSE	FALSE	FALSE	FALSE	FALSE	0	UNCHECKED
I	WBGene00001427	fkb-2	FALSE	FALSE	FALSE	FALSE	0	FALSE	FALSE	FALSE	FALSE	FALSE	0	UNCHECKED
I	WBGene00001501	ftn-2	FALSE	FALSE	FALSE	FALSE	0	FALSE	FALSE	FALSE	FALSE	FALSE	0	UNCHECKED
X	WBGene00001502	ftt-2	FALSE	FALSE	FALSE	FALSE	0	FALSE	FALSE	FALSE	FALSE	FALSE	0	UNCHECKED
X	WBGene00001520	gas-1	FALSE	FALSE	FALSE	FALSE	0	FALSE	FALSE	FALSE	FALSE	FALSE	0	UNCHECKED
IV	WBGene00001604	gln-3	FALSE	FALSE	FALSE	FALSE	0	FALSE	FALSE	FALSE	FALSE	FALSE	0	UNCHECKED
X	WBGene00001684	gpd-2	FALSE	FALSE	FALSE	FALSE	0	FALSE	FALSE	FALSE	FALSE	FALSE	0	UNCHECKED
X	WBGene00001685	gpd-3	FALSE	FALSE	FALSE	FALSE	0	FALSE	FALSE	FALSE	FALSE	FALSE	0	UNCHECKED
V	WBGene00001694	grd-5	FALSE	FALSE	FALSE	FALSE	0	FALSE	FALSE	FALSE	FALSE	FALSE	0	UNCHECKED
III	WBGene00001748	gsp-2	FALSE	FALSE	FALSE	FALSE	0	FALSE	FALSE	FALSE	FALSE	FALSE	0	UNCHECKED
V	WBGene00001758	gst-10	FALSE	FALSE	FALSE	FALSE	0	FALSE	FALSE	FALSE	FALSE	FALSE	0	UNCHECKED
III	WBGene00001946	his-72	FALSE	FALSE	FALSE	FALSE	0	FALSE	FALSE	FALSE	FALSE	FALSE	0	UNCHECKED
II	WBGene00001971	hmg-1.1	FALSE	FALSE	FALSE	FALSE	0	FALSE	FALSE	FALSE	FALSE	FALSE	0	UNCHECKED
III	WBGene00001993	hpd-1	FALSE	FALSE	FALSE	FALSE	0	FALSE	FALSE	FALSE	FALSE	FALSE	0	UNCHECKED
IV	WBGene00002005	hsp-1	FALSE	FALSE	FALSE	FALSE	0	FALSE	FALSE	FALSE	FALSE	FALSE	0	UNCHECKED
X	WBGene00002007	hsp-3	FALSE	FALSE	FALSE	FALSE	0	FALSE	FALSE	FALSE	FALSE	FALSE	0	UNCHECKED
II	WBGene00002008	hsp-4	FALSE	FALSE	FALSE	FALSE	0	FALSE	FALSE	FALSE	FALSE	FALSE	0	UNCHECKED
V	WBGene00002010	hsp-6	FALSE	FALSE	FALSE	FALSE	0	FALSE	FALSE	FALSE	FALSE	FALSE	0	UNCHECKED
III	WBGene00002025	hsp-60	FALSE	FALSE	FALSE	FALSE	0	FALSE	FALSE	FALSE	FALSE	FALSE	0	UNCHECKED
II	WBGene00002045	icd-1	FALSE	FALSE	FALSE	FALSE	0	FALSE	FALSE	FALSE	FALSE	FALSE	0	UNCHECKED
II	WBGene00002054	ifb-2	FALSE	FALSE	FALSE	FALSE	0	FALSE	FALSE	FALSE	FALSE	FALSE	0	UNCHECKED
III	WBGene00002059	ife-1	FALSE	FALSE	FALSE	FALSE	0	FALSE	FALSE	FALSE	FALSE	FALSE	0	UNCHECKED
II	WBGene00002065	iff-2	FALSE	FALSE	FALSE	FALSE	0	FALSE	FALSE	FALSE	FALSE	FALSE	0	UNCHECKED
III	WBGene00002083	inf-1	FALSE	FALSE	FALSE	FALSE	0	FALSE	FALSE	FALSE	FALSE	FALSE	0	UNCHECKED
IV	WBGene00002162	isp-1	FALSE	FALSE	FALSE	FALSE	0	FALSE	FALSE	FALSE	FALSE	FALSE	0	UNCHECKED
I	WBGene00002191	kin-3	FALSE	FALSE	FALSE	FALSE	0	FALSE	FALSE	FALSE	FALSE	FALSE	0	UNCHECKED
I	WBGene00002196	kin-10	FALSE	FALSE	FALSE	FALSE	0	FALSE	FALSE	FALSE	FALSE	FALSE	0	UNCHECKED
III	WBGene00002202	kin-19	FALSE	FALSE	FALSE	FALSE	0	FALSE	FALSE	FALSE	FALSE	FALSE	0	UNCHECKED
II	WBGene00002238	kars-1	FALSE	FALSE	FALSE	FALSE	0	FALSE	FALSE	FALSE	FALSE	FALSE	0	UNCHECKED
V	WBGene00002250	lap-2	FALSE	FALSE	FALSE	FALSE	0	FALSE	FALSE	FALSE	FALSE	FALSE	0	UNCHECKED
X	WBGene00002254	lbp-2	FALSE	FALSE	FALSE	FALSE	0	FALSE	FALSE	FALSE	FALSE	FALSE	0	UNCHECKED
I	WBGene00002257	lbp-5	FALSE	FALSE	FALSE	FALSE	0	FALSE	FALSE	FALSE	FALSE	FALSE	0	UNCHECKED
I	WBGene00002258	lbp-6	FALSE	FALSE	FALSE	FALSE	0	FALSE	FALSE	FALSE	FALSE	FALSE	0	UNCHECKED
II	WBGene00002264	lec-1	FALSE	FALSE	FALSE	FALSE	0	FALSE	FALSE	FALSE	FALSE	FALSE	0	UNCHECKED
II	WBGene00002265	lec-2	FALSE	FALSE	FALSE	FALSE	0	FALSE	FALSE	FALSE	FALSE	FALSE	0	UNCHECKED
II	WBGene00002268	lec-5	FALSE	FALSE	FALSE	FALSE	0	FALSE	FALSE	FALSE	FALSE	FALSE	0	UNCHECKED
III	WBGene00002269	lec-6	FALSE	FALSE	FALSE	FALSE	0	FALSE	FALSE	FALSE	FALSE	FALSE	0	UNCHECKED
X	WBGene00002271	lec-8	FALSE	FALSE	FALSE	FALSE	0	FALSE	FALSE	FALSE	FALSE	FALSE	0	UNCHECKED
X	WBGene00002272	lec-9	FALSE	FALSE	FALSE	FALSE	0	FALSE	FALSE	FALSE	FALSE	FALSE	0	UNCHECKED
V	WBGene00002273	lec-10	FALSE	FALSE	FALSE	FALSE	0	FALSE	FALSE	FALSE	FALSE	FALSE	0	UNCHECKED
IV	WBGene00002344	let-70	FALSE	FALSE	FALSE	FALSE	0	FALSE	FALSE	FALSE	FALSE	FALSE	0	UNCHECKED
III	WBGene00002891	let-767	FALSE	FALSE	FALSE	FALSE	0	FALSE	FALSE	FALSE	FALSE	FALSE	0	UNCHECKED
I	WBGene00002978	lev-11	FALSE	FALSE	FALSE	FALSE	0	FALSE	FALSE	FALSE	FALSE	FALSE	0	UNCHECKED
II	WBGene00002980	lgg-1	FALSE	FALSE	FALSE	FALSE	0	FALSE	FALSE	FALSE	FALSE	FALSE	0	UNCHECKED
I	WBGene00003061	lpd-5	FALSE	FALSE	FALSE	FALSE	0	FALSE	FALSE	FALSE	FALSE	FALSE	0	UNCHECKED
III	WBGene00003063	lpd-7	FALSE	FALSE	FALSE	FALSE	0	FALSE	FALSE	FALSE	FALSE	FALSE	0	UNCHECKED
V	WBGene00003065	lpd-9	FALSE	FALSE	FALSE	FALSE	0	FALSE	FALSE	FALSE	FALSE	FALSE	0	UNCHECKED
IV	WBGene00003085	ccar-1	FALSE	FALSE	FALSE	FALSE	0	FALSE	FALSE	FALSE	FALSE	FALSE	0	UNCHECKED
V	WBGene00003090	lys-1	FALSE	FALSE	FALSE	FALSE	0	FALSE	FALSE	FALSE	FALSE	FALSE	0	UNCHECKED
IV	WBGene00003148	mbf-1	FALSE	FALSE	FALSE	FALSE	0	FALSE	FALSE	FALSE	FALSE	FALSE	0	UNCHECKED
III	WBGene00003162	mdh-2	FALSE	FALSE	FALSE	FALSE	0	FALSE	FALSE	FALSE	FALSE	FALSE	0	UNCHECKED
III	WBGene00003214	mel-32	FALSE	FALSE	FALSE	FALSE	0	FALSE	FALSE	FALSE	FALSE	FALSE	0	UNCHECKED
V	WBGene00003242	mig-6	FALSE	FALSE	FALSE	FALSE	0	FALSE	FALSE	FALSE	FALSE	FALSE	0	UNCHECKED
X	WBGene00003369	mlc-1	FALSE	FALSE	FALSE	FALSE	0	FALSE	FALSE	FALSE	FALSE	FALSE	0	UNCHECKED
III	WBGene00003371	mlc-3	FALSE	FALSE	FALSE	FALSE	0	FALSE	FALSE	FALSE	FALSE	FALSE	0	UNCHECKED
III	WBGene00003375	mlp-1	FALSE	FALSE	FALSE	FALSE	0	FALSE	FALSE	FALSE	FALSE	FALSE	0	UNCHECKED
II	WBGene00003424	msp-3	FALSE	FALSE	FALSE	FALSE	0	FALSE	FALSE	FALSE	FALSE	FALSE	0	UNCHECKED
IV	WBGene00003425	msp-10	FALSE	FALSE	FALSE	FALSE	0	FALSE	FALSE	FALSE	FALSE	FALSE	0	UNCHECKED
IV	WBGene00003426	msp-19	FALSE	FALSE	FALSE	FALSE	0	FALSE	FALSE	FALSE	FALSE	FALSE	0	UNCHECKED
II	WBGene00003429	msp-31	FALSE	FALSE	FALSE	FALSE	0	FALSE	FALSE	FALSE	FALSE	FALSE	0	UNCHECKED
II	WBGene00003431	msp-33	FALSE	FALSE	FALSE	FALSE	0	FALSE	FALSE	FALSE	FALSE	FALSE	0	UNCHECKED
IV	WBGene00003432	msp-36	FALSE	FALSE	FALSE	FALSE	0	FALSE	FALSE	FALSE	FALSE	FALSE	0	UNCHECKED
IV	WBGene00003434	msp-38	FALSE	FALSE	FALSE	FALSE	0	FALSE	FALSE	FALSE	FALSE	FALSE	0	UNCHECKED
II	WBGene00003435	msp-40	FALSE	FALSE	FALSE	FALSE	0	FALSE	FALSE	FALSE	FALSE	FALSE	0	UNCHECKED
II	WBGene00003438	msp-45	FALSE	FALSE	FALSE	FALSE	0	FALSE	FALSE	FALSE	FALSE	FALSE	0	UNCHECKED
II	WBGene00003442	msp-49	FALSE	FALSE	FALSE	FALSE	0	FALSE	FALSE	FALSE	FALSE	FALSE	0	UNCHECKED
II	WBGene00003443	msp-50	FALSE	FALSE	FALSE	FALSE	0	FALSE	FALSE	FALSE	FALSE	FALSE	0	UNCHECKED
IV	WBGene00003449	msp-56	FALSE	FALSE	FALSE	FALSE	0	FALSE	FALSE	FALSE	FALSE	FALSE	0	UNCHECKED
IV	WBGene00003452	msp-59	FALSE	FALSE	FALSE	FALSE	0	FALSE	FALSE	FALSE	FALSE	FALSE	0	UNCHECKED
II	WBGene00003457	msp-64	FALSE	FALSE	FALSE	FALSE	0	FALSE	FALSE	FALSE	FALSE	FALSE	0	UNCHECKED
IV	WBGene00003464	msp-77	FALSE	FALSE	FALSE	FALSE	0	FALSE	FALSE	FALSE	FALSE	FALSE	0	UNCHECKED
IV	WBGene00003465	msp-78	FALSE	FALSE	FALSE	FALSE	0	FALSE	FALSE	FALSE	FALSE	FALSE	0	UNCHECKED
IV	WBGene00003466	msp-79	FALSE	FALSE	FALSE	FALSE	0	FALSE	FALSE	FALSE	FALSE	FALSE	0	UNCHECKED
IV	WBGene00003467	msp-81	FALSE	FALSE	FALSE	FALSE	0	FALSE	FALSE	FALSE	FALSE	FALSE	0	UNCHECKED
IV	WBGene00003468	msp-113	FALSE	FALSE	FALSE	FALSE	0	FALSE	FALSE	FALSE	FALSE	FALSE	0	UNCHECKED
II	WBGene00003469	msp-142	FALSE	FALSE	FALSE	FALSE	0	FALSE	FALSE	FALSE	FALSE	FALSE	0	UNCHECKED
II	WBGene00003470	msp-152	FALSE	FALSE	FALSE	FALSE	0	FALSE	FALSE	FALSE	FALSE	FALSE	0	UNCHECKED
X	WBGene00003495	mup-2	FALSE	FALSE	FALSE	FALSE	0	FALSE	FALSE	FALSE	FALSE	FALSE	0	UNCHECKED
V	WBGene00003515	myo-3	FALSE	FALSE	FALSE	FALSE	0	FALSE	FALSE	FALSE	FALSE	FALSE	0	UNCHECKED
III	WBGene00003588	nex-1	FALSE	FALSE	FALSE	FALSE	0	FALSE	FALSE	FALSE	FALSE	FALSE	0	UNCHECKED
V	WBGene00003765	nlp-27	FALSE	FALSE	FALSE	FALSE	0	FALSE	FALSE	FALSE	FALSE	FALSE	0	UNCHECKED
X	WBGene00003776	nmy-1	FALSE	FALSE	FALSE	FALSE	0	FALSE	FALSE	FALSE	FALSE	FALSE	0	UNCHECKED
V	WBGene00003786	npa-1	FALSE	FALSE	FALSE	FALSE	0	FALSE	FALSE	FALSE	FALSE	FALSE	0	UNCHECKED
II	WBGene00003813	nrf-6	FALSE	FALSE	FALSE	FALSE	0	FALSE	FALSE	FALSE	FALSE	FALSE	0	UNCHECKED
II	WBGene00003821	nst-1	FALSE	FALSE	FALSE	FALSE	0	FALSE	FALSE	FALSE	FALSE	FALSE	0	UNCHECKED
II	WBGene00003831	nuo-1	FALSE	FALSE	FALSE	FALSE	0	FALSE	FALSE	FALSE	FALSE	FALSE	0	UNCHECKED
X	WBGene00003891	osm-11	FALSE	FALSE	FALSE	FALSE	0	FALSE	FALSE	FALSE	FALSE	FALSE	0	UNCHECKED
IV	WBGene00003893	ost-1	FALSE	FALSE	FALSE	FALSE	0	FALSE	FALSE	FALSE	FALSE	FALSE	0	UNCHECKED
III	WBGene00003901	paa-1	FALSE	FALSE	FALSE	FALSE	0	FALSE	FALSE	FALSE	FALSE	FALSE	0	UNCHECKED
I	WBGene00003902	pab-1	FALSE	FALSE	FALSE	FALSE	0	FALSE	FALSE	FALSE	FALSE	FALSE	0	UNCHECKED
IV	WBGene00003920	par-5	FALSE	FALSE	FALSE	FALSE	0	FALSE	FALSE	FALSE	FALSE	FALSE	0	UNCHECKED
V	WBGene00003922	pas-1	FALSE	FALSE	FALSE	FALSE	0	FALSE	FALSE	FALSE	FALSE	FALSE	0	UNCHECKED
V	WBGene00003923	pas-2	FALSE	FALSE	FALSE	FALSE	0	FALSE	FALSE	FALSE	FALSE	FALSE	0	UNCHECKED
I	WBGene00003924	pas-3	FALSE	FALSE	FALSE	FALSE	0	FALSE	FALSE	FALSE	FALSE	FALSE	0	UNCHECKED
I	WBGene00003925	pas-4	FALSE	FALSE	FALSE	FALSE	0	FALSE	FALSE	FALSE	FALSE	FALSE	0	UNCHECKED
I	WBGene00003926	pas-5	FALSE	FALSE	FALSE	FALSE	0	FALSE	FALSE	FALSE	FALSE	FALSE	0	UNCHECKED
V	WBGene00003927	pas-6	FALSE	FALSE	FALSE	FALSE	0	FALSE	FALSE	FALSE	FALSE	FALSE	0	UNCHECKED
IV	WBGene00003947	pbs-1	FALSE	FALSE	FALSE	FALSE	0	FALSE	FALSE	FALSE	FALSE	FALSE	0	UNCHECKED
I	WBGene00003948	pbs-2	FALSE	FALSE	FALSE	FALSE	0	FALSE	FALSE	FALSE	FALSE	FALSE	0	UNCHECKED
III	WBGene00003952	pbs-6	FALSE	FALSE	FALSE	FALSE	0	FALSE	FALSE	FALSE	FALSE	FALSE	0	UNCHECKED
I	WBGene00003953	pbs-7	FALSE	FALSE	FALSE	FALSE	0	FALSE	FALSE	FALSE	FALSE	FALSE	0	UNCHECKED
III	WBGene00003962	pdi-1	FALSE	FALSE	FALSE	FALSE	0	FALSE	FALSE	FALSE	FALSE	FALSE	0	UNCHECKED
X	WBGene00003963	pdi-2	FALSE	FALSE	FALSE	FALSE	0	FALSE	FALSE	FALSE	FALSE	FALSE	0	UNCHECKED
I	WBGene00003964	pdi-3	FALSE	FALSE	FALSE	FALSE	0	FALSE	FALSE	FALSE	FALSE	FALSE	0	UNCHECKED
V	WBGene00003982	pes-9	FALSE	FALSE	FALSE	FALSE	0	FALSE	FALSE	FALSE	FALSE	FALSE	0	UNCHECKED
I	WBGene00003989	pfn-1	FALSE	FALSE	FALSE	FALSE	0	FALSE	FALSE	FALSE	FALSE	FALSE	0	UNCHECKED
I	WBGene00004014	phb-1	FALSE	FALSE	FALSE	FALSE	0	FALSE	FALSE	FALSE	FALSE	FALSE	0	UNCHECKED
II	WBGene00004015	phb-2	FALSE	FALSE	FALSE	FALSE	0	FALSE	FALSE	FALSE	FALSE	FALSE	0	UNCHECKED
IV	WBGene00004046	plp-1	FALSE	FALSE	FALSE	FALSE	0	FALSE	FALSE	FALSE	FALSE	FALSE	0	UNCHECKED
II	WBGene00004076	pod-2	FALSE	FALSE	FALSE	FALSE	0	FALSE	FALSE	FALSE	FALSE	FALSE	0	UNCHECKED
I	WBGene00004143	pqn-59	FALSE	FALSE	FALSE	FALSE	0	FALSE	FALSE	FALSE	FALSE	FALSE	0	UNCHECKED
V	WBGene00004266	rab-1	FALSE	FALSE	FALSE	FALSE	0	FALSE	FALSE	FALSE	FALSE	FALSE	0	UNCHECKED
I	WBGene00004274	rab-11.1	FALSE	FALSE	FALSE	FALSE	0	FALSE	FALSE	FALSE	FALSE	FALSE	0	UNCHECKED
II	WBGene00004300	ram-2	FALSE	FALSE	FALSE	FALSE	0	FALSE	FALSE	FALSE	FALSE	FALSE	0	UNCHECKED
III	WBGene00004302	ran-1	FALSE	FALSE	FALSE	FALSE	0	FALSE	FALSE	FALSE	FALSE	FALSE	0	UNCHECKED
IV	WBGene00004357	rho-1	FALSE	FALSE	FALSE	FALSE	0	FALSE	FALSE	FALSE	FALSE	FALSE	0	UNCHECKED
V	WBGene00004358	rhr-1	FALSE	FALSE	FALSE	FALSE	0	FALSE	FALSE	FALSE	FALSE	FALSE	0	UNCHECKED
V	WBGene00004373	rme-1	FALSE	FALSE	FALSE	FALSE	0	FALSE	FALSE	FALSE	FALSE	FALSE	0	UNCHECKED
I	WBGene00004408	rplp-0	FALSE	FALSE	FALSE	FALSE	0	FALSE	FALSE	FALSE	FALSE	FALSE	0	UNCHECKED
I	WBGene00004409	rplp-1	FALSE	FALSE	FALSE	FALSE	0	FALSE	FALSE	FALSE	FALSE	FALSE	0	UNCHECKED
V	WBGene00004413	rpl-8	FALSE	FALSE	FALSE	FALSE	0	FALSE	FALSE	FALSE	FALSE	FALSE	0	UNCHECKED
I	WBGene00004415	rpl-4	FALSE	FALSE	FALSE	FALSE	0	FALSE	FALSE	FALSE	FALSE	FALSE	0	UNCHECKED
II	WBGene00004416	rpl-5	FALSE	FALSE	FALSE	FALSE	0	FALSE	FALSE	FALSE	FALSE	FALSE	0	UNCHECKED
III	WBGene00004417	rpl-6	FALSE	FALSE	FALSE	FALSE	0	FALSE	FALSE	FALSE	FALSE	FALSE	0	UNCHECKED
I	WBGene00004418	rpl-7	FALSE	FALSE	FALSE	FALSE	0	FALSE	FALSE	FALSE	FALSE	FALSE	0	UNCHECKED
III	WBGene00004420	rpl-9	FALSE	FALSE	FALSE	FALSE	0	FALSE	FALSE	FALSE	FALSE	FALSE	0	UNCHECKED
II	WBGene00004421	rpl-10L	FALSE	FALSE	FALSE	FALSE	0	FALSE	FALSE	FALSE	FALSE	FALSE	0	UNCHECKED
X	WBGene00004423	rpl-11.2	FALSE	FALSE	FALSE	FALSE	0	FALSE	FALSE	FALSE	FALSE	FALSE	0	UNCHECKED
I	WBGene00004425	rpl-13	FALSE	FALSE	FALSE	FALSE	0	FALSE	FALSE	FALSE	FALSE	FALSE	0	UNCHECKED
I	WBGene00004426	rpl-14	FALSE	FALSE	FALSE	FALSE	0	FALSE	FALSE	FALSE	FALSE	FALSE	0	UNCHECKED
IV	WBGene00004427	rpl-15	FALSE	FALSE	FALSE	FALSE	0	FALSE	FALSE	FALSE	FALSE	FALSE	0	UNCHECKED
III	WBGene00004428	rpl-13A	FALSE	FALSE	FALSE	FALSE	0	FALSE	FALSE	FALSE	FALSE	FALSE	0	UNCHECKED
I	WBGene00004429	rpl-17	FALSE	FALSE	FALSE	FALSE	0	FALSE	FALSE	FALSE	FALSE	FALSE	0	UNCHECKED
IV	WBGene00004430	rpl-18	FALSE	FALSE	FALSE	FALSE	0	FALSE	FALSE	FALSE	FALSE	FALSE	0	UNCHECKED
I	WBGene00004431	rpl-19	FALSE	FALSE	FALSE	FALSE	0	FALSE	FALSE	FALSE	FALSE	FALSE	0	UNCHECKED
IV	WBGene00004432	rpl-18A	FALSE	FALSE	FALSE	FALSE	0	FALSE	FALSE	FALSE	FALSE	FALSE	0	UNCHECKED
III	WBGene00004433	rpl-21	FALSE	FALSE	FALSE	FALSE	0	FALSE	FALSE	FALSE	FALSE	FALSE	0	UNCHECKED
II	WBGene00004434	rpl-22	FALSE	FALSE	FALSE	FALSE	0	FALSE	FALSE	FALSE	FALSE	FALSE	0	UNCHECKED
III	WBGene00004435	rpl-23	FALSE	FALSE	FALSE	FALSE	0	FALSE	FALSE	FALSE	FALSE	FALSE	0	UNCHECKED
I	WBGene00004436	rpl-24	FALSE	FALSE	FALSE	FALSE	0	FALSE	FALSE	FALSE	FALSE	FALSE	0	UNCHECKED
X	WBGene00004438	rpl-23A.1	FALSE	FALSE	FALSE	FALSE	0	FALSE	FALSE	FALSE	FALSE	FALSE	0	UNCHECKED
I	WBGene00004439	rpl-23A.2	FALSE	FALSE	FALSE	FALSE	0	FALSE	FALSE	FALSE	FALSE	FALSE	0	UNCHECKED
I	WBGene00004441	rpl-27	FALSE	FALSE	FALSE	FALSE	0	FALSE	FALSE	FALSE	FALSE	FALSE	0	UNCHECKED
V	WBGene00004442	rpl-28	FALSE	FALSE	FALSE	FALSE	0	FALSE	FALSE	FALSE	FALSE	FALSE	0	UNCHECKED
IV	WBGene00004443	rpl-29	FALSE	FALSE	FALSE	FALSE	0	FALSE	FALSE	FALSE	FALSE	FALSE	0	UNCHECKED
I	WBGene00004445	rpl-31	FALSE	FALSE	FALSE	FALSE	0	FALSE	FALSE	FALSE	FALSE	FALSE	0	UNCHECKED
II	WBGene00004446	rpl-32	FALSE	FALSE	FALSE	FALSE	0	FALSE	FALSE	FALSE	FALSE	FALSE	0	UNCHECKED
IV	WBGene00004448	rpl-34	FALSE	FALSE	FALSE	FALSE	0	FALSE	FALSE	FALSE	FALSE	FALSE	0	UNCHECKED
III	WBGene00004449	rpl-35	FALSE	FALSE	FALSE	FALSE	0	FALSE	FALSE	FALSE	FALSE	FALSE	0	UNCHECKED
III	WBGene00004450	rpl-36	FALSE	FALSE	FALSE	FALSE	0	FALSE	FALSE	FALSE	FALSE	FALSE	0	UNCHECKED
III	WBGene00004451	rpl-37.2	FALSE	FALSE	FALSE	FALSE	0	FALSE	FALSE	FALSE	FALSE	FALSE	0	UNCHECKED
V	WBGene00004452	rpl-38	FALSE	FALSE	FALSE	FALSE	0	FALSE	FALSE	FALSE	FALSE	FALSE	0	UNCHECKED
II	WBGene00004454	rpl-36A	FALSE	FALSE	FALSE	FALSE	0	FALSE	FALSE	FALSE	FALSE	FALSE	0	UNCHECKED
II	WBGene00004456	rpl-37A	FALSE	FALSE	FALSE	FALSE	0	FALSE	FALSE	FALSE	FALSE	FALSE	0	UNCHECKED
IV	WBGene00004458	rpn-1	FALSE	FALSE	FALSE	FALSE	0	FALSE	FALSE	FALSE	FALSE	FALSE	0	UNCHECKED
III	WBGene00004460	rpn-3	FALSE	FALSE	FALSE	FALSE	0	FALSE	FALSE	FALSE	FALSE	FALSE	0	UNCHECKED
II	WBGene00004461	rpn-5	FALSE	FALSE	FALSE	FALSE	0	FALSE	FALSE	FALSE	FALSE	FALSE	0	UNCHECKED
IV	WBGene00004463	rpn-7	FALSE	FALSE	FALSE	FALSE	0	FALSE	FALSE	FALSE	FALSE	FALSE	0	UNCHECKED
II	WBGene00004468	rpn-12	FALSE	FALSE	FALSE	FALSE	0	FALSE	FALSE	FALSE	FALSE	FALSE	0	UNCHECKED
III	WBGene00004469	rpsa-1	FALSE	FALSE	FALSE	FALSE	0	FALSE	FALSE	FALSE	FALSE	FALSE	0	UNCHECKED
III	WBGene00004470	rps-3A	FALSE	FALSE	FALSE	FALSE	0	FALSE	FALSE	FALSE	FALSE	FALSE	0	UNCHECKED
IV	WBGene00004471	rps-2	FALSE	FALSE	FALSE	FALSE	0	FALSE	FALSE	FALSE	FALSE	FALSE	0	UNCHECKED
III	WBGene00004472	rps-3	FALSE	FALSE	FALSE	FALSE	0	FALSE	FALSE	FALSE	FALSE	FALSE	0	UNCHECKED
IV	WBGene00004474	rps-5	FALSE	FALSE	FALSE	FALSE	0	FALSE	FALSE	FALSE	FALSE	FALSE	0	UNCHECKED
I	WBGene00004475	rps-6	FALSE	FALSE	FALSE	FALSE	0	FALSE	FALSE	FALSE	FALSE	FALSE	0	UNCHECKED
I	WBGene00004476	rps-7	FALSE	FALSE	FALSE	FALSE	0	FALSE	FALSE	FALSE	FALSE	FALSE	0	UNCHECKED
IV	WBGene00004477	rps-8	FALSE	FALSE	FALSE	FALSE	0	FALSE	FALSE	FALSE	FALSE	FALSE	0	UNCHECKED
II	WBGene00004478	rps-9	FALSE	FALSE	FALSE	FALSE	0	FALSE	FALSE	FALSE	FALSE	FALSE	0	UNCHECKED
I	WBGene00004479	rps-10	FALSE	FALSE	FALSE	FALSE	0	FALSE	FALSE	FALSE	FALSE	FALSE	0	UNCHECKED
IV	WBGene00004480	rps-11	FALSE	FALSE	FALSE	FALSE	0	FALSE	FALSE	FALSE	FALSE	FALSE	0	UNCHECKED
III	WBGene00004481	rps-12	FALSE	FALSE	FALSE	FALSE	0	FALSE	FALSE	FALSE	FALSE	FALSE	0	UNCHECKED
III	WBGene00004482	rps-13	FALSE	FALSE	FALSE	FALSE	0	FALSE	FALSE	FALSE	FALSE	FALSE	0	UNCHECKED
III	WBGene00004483	rps-14	FALSE	FALSE	FALSE	FALSE	0	FALSE	FALSE	FALSE	FALSE	FALSE	0	UNCHECKED
I	WBGene00004484	rps-15	FALSE	FALSE	FALSE	FALSE	0	FALSE	FALSE	FALSE	FALSE	FALSE	0	UNCHECKED
V	WBGene00004485	rps-16	FALSE	FALSE	FALSE	FALSE	0	FALSE	FALSE	FALSE	FALSE	FALSE	0	UNCHECKED
I	WBGene00004486	rps-17	FALSE	FALSE	FALSE	FALSE	0	FALSE	FALSE	FALSE	FALSE	FALSE	0	UNCHECKED
IV	WBGene00004487	rps-18	FALSE	FALSE	FALSE	FALSE	0	FALSE	FALSE	FALSE	FALSE	FALSE	0	UNCHECKED
I	WBGene00004488	rps-19	FALSE	FALSE	FALSE	FALSE	0	FALSE	FALSE	FALSE	FALSE	FALSE	0	UNCHECKED
III	WBGene00004490	rps-21	FALSE	FALSE	FALSE	FALSE	0	FALSE	FALSE	FALSE	FALSE	FALSE	0	UNCHECKED
IV	WBGene00004492	rps-23	FALSE	FALSE	FALSE	FALSE	0	FALSE	FALSE	FALSE	FALSE	FALSE	0	UNCHECKED
IV	WBGene00004493	rps-24	FALSE	FALSE	FALSE	FALSE	0	FALSE	FALSE	FALSE	FALSE	FALSE	0	UNCHECKED
IV	WBGene00004494	rps-25	FALSE	FALSE	FALSE	FALSE	0	FALSE	FALSE	FALSE	FALSE	FALSE	0	UNCHECKED
I	WBGene00004495	rps-26	FALSE	FALSE	FALSE	FALSE	0	FALSE	FALSE	FALSE	FALSE	FALSE	0	UNCHECKED
V	WBGene00004496	rps-27	FALSE	FALSE	FALSE	FALSE	0	FALSE	FALSE	FALSE	FALSE	FALSE	0	UNCHECKED
IV	WBGene00004497	rps-28	FALSE	FALSE	FALSE	FALSE	0	FALSE	FALSE	FALSE	FALSE	FALSE	0	UNCHECKED
III	WBGene00004498	rps-29	FALSE	FALSE	FALSE	FALSE	0	FALSE	FALSE	FALSE	FALSE	FALSE	0	UNCHECKED
V	WBGene00004499	fau-1	FALSE	FALSE	FALSE	FALSE	0	FALSE	FALSE	FALSE	FALSE	FALSE	0	UNCHECKED
V	WBGene00004501	rpt-1	FALSE	FALSE	FALSE	FALSE	0	FALSE	FALSE	FALSE	FALSE	FALSE	0	UNCHECKED
III	WBGene00004503	rpt-3	FALSE	FALSE	FALSE	FALSE	0	FALSE	FALSE	FALSE	FALSE	FALSE	0	UNCHECKED
II	WBGene00004504	rpt-4	FALSE	FALSE	FALSE	FALSE	0	FALSE	FALSE	FALSE	FALSE	FALSE	0	UNCHECKED
I	WBGene00004505	rpt-5	FALSE	FALSE	FALSE	FALSE	0	FALSE	FALSE	FALSE	FALSE	FALSE	0	UNCHECKED
III	WBGene00004700	rsp-3	FALSE	FALSE	FALSE	FALSE	0	FALSE	FALSE	FALSE	FALSE	FALSE	0	UNCHECKED
III	WBGene00004736	sca-1	FALSE	FALSE	FALSE	FALSE	0	FALSE	FALSE	FALSE	FALSE	FALSE	0	UNCHECKED
V	WBGene00004897	snb-1	FALSE	FALSE	FALSE	FALSE	0	FALSE	FALSE	FALSE	FALSE	FALSE	0	UNCHECKED
IV	WBGene00004914	snr-1	FALSE	FALSE	FALSE	FALSE	0	FALSE	FALSE	FALSE	FALSE	FALSE	0	UNCHECKED
I	WBGene00004915	snr-2	FALSE	FALSE	FALSE	FALSE	0	FALSE	FALSE	FALSE	FALSE	FALSE	0	UNCHECKED
V	WBGene00004917	snr-4	FALSE	FALSE	FALSE	FALSE	0	FALSE	FALSE	FALSE	FALSE	FALSE	0	UNCHECKED
III	WBGene00004918	snr-5	FALSE	FALSE	FALSE	FALSE	0	FALSE	FALSE	FALSE	FALSE	FALSE	0	UNCHECKED
I	WBGene00004920	snr-7	FALSE	FALSE	FALSE	FALSE	0	FALSE	FALSE	FALSE	FALSE	FALSE	0	UNCHECKED
X	WBGene00004988	spp-3	FALSE	FALSE	FALSE	FALSE	0	FALSE	FALSE	FALSE	FALSE	FALSE	0	UNCHECKED
X	WBGene00004990	spp-5	FALSE	FALSE	FALSE	FALSE	0	FALSE	FALSE	FALSE	FALSE	FALSE	0	UNCHECKED
IV	WBGene00004995	spp-10	FALSE	FALSE	FALSE	FALSE	0	FALSE	FALSE	FALSE	FALSE	FALSE	0	UNCHECKED
X	WBGene00004999	spp-14	FALSE	FALSE	FALSE	FALSE	0	FALSE	FALSE	FALSE	FALSE	FALSE	0	UNCHECKED
I	WBGene00005002	spp-17	FALSE	FALSE	FALSE	FALSE	0	FALSE	FALSE	FALSE	FALSE	FALSE	0	UNCHECKED
IV	WBGene00006038	ssp-9	FALSE	FALSE	FALSE	FALSE	0	FALSE	FALSE	FALSE	FALSE	FALSE	0	UNCHECKED
IV	WBGene00006039	ssp-10	FALSE	FALSE	FALSE	FALSE	0	FALSE	FALSE	FALSE	FALSE	FALSE	0	UNCHECKED
IV	WBGene00006040	ssp-11	FALSE	FALSE	FALSE	FALSE	0	FALSE	FALSE	FALSE	FALSE	FALSE	0	UNCHECKED
IV	WBGene00006053	ssq-4	FALSE	FALSE	FALSE	FALSE	0	FALSE	FALSE	FALSE	FALSE	FALSE	0	UNCHECKED
II	WBGene00006433	sdhb-1	FALSE	FALSE	FALSE	FALSE	0	FALSE	FALSE	FALSE	FALSE	FALSE	0	UNCHECKED
II	WBGene00006434	prdx-2	FALSE	FALSE	FALSE	FALSE	0	FALSE	FALSE	FALSE	FALSE	FALSE	0	UNCHECKED
III	WBGene00006439	ant-1.1	FALSE	FALSE	FALSE	FALSE	0	FALSE	FALSE	FALSE	FALSE	FALSE	0	UNCHECKED
III	WBGene00006452	heh-1	FALSE	FALSE	FALSE	FALSE	0	FALSE	FALSE	FALSE	FALSE	FALSE	0	UNCHECKED
III	WBGene00006519	cox-6A	FALSE	FALSE	FALSE	FALSE	0	FALSE	FALSE	FALSE	FALSE	FALSE	0	UNCHECKED
I	WBGene00006528	tba-1	FALSE	FALSE	FALSE	FALSE	0	FALSE	FALSE	FALSE	FALSE	FALSE	0	UNCHECKED
I	WBGene00006529	tba-2	FALSE	FALSE	FALSE	FALSE	0	FALSE	FALSE	FALSE	FALSE	FALSE	0	UNCHECKED
II	WBGene00006530	tba-4	FALSE	FALSE	FALSE	FALSE	0	FALSE	FALSE	FALSE	FALSE	FALSE	0	UNCHECKED
III	WBGene00006536	tbb-1	FALSE	FALSE	FALSE	FALSE	0	FALSE	FALSE	FALSE	FALSE	FALSE	0	UNCHECKED
I	WBGene00006574	tin-13	FALSE	FALSE	FALSE	FALSE	0	FALSE	FALSE	FALSE	FALSE	FALSE	0	UNCHECKED
X	WBGene00006587	tnt-2	FALSE	FALSE	FALSE	FALSE	0	FALSE	FALSE	FALSE	FALSE	FALSE	0	UNCHECKED
II	WBGene00006601	tpi-1	FALSE	FALSE	FALSE	FALSE	0	FALSE	FALSE	FALSE	FALSE	FALSE	0	UNCHECKED
II	WBGene00006626	tsn-1	FALSE	FALSE	FALSE	FALSE	0	FALSE	FALSE	FALSE	FALSE	FALSE	0	UNCHECKED
III	WBGene00006704	ubc-7	FALSE	FALSE	FALSE	FALSE	0	FALSE	FALSE	FALSE	FALSE	FALSE	0	UNCHECKED
III	WBGene00006713	ubc-18	FALSE	FALSE	FALSE	FALSE	0	FALSE	FALSE	FALSE	FALSE	FALSE	0	UNCHECKED
III	WBGene00006728	ubq-2	FALSE	FALSE	FALSE	FALSE	0	FALSE	FALSE	FALSE	FALSE	FALSE	0	UNCHECKED
I	WBGene00006754	unc-15	FALSE	FALSE	FALSE	FALSE	0	FALSE	FALSE	FALSE	FALSE	FALSE	0	UNCHECKED
X	WBGene00006764	unc-27	FALSE	FALSE	FALSE	FALSE	0	FALSE	FALSE	FALSE	FALSE	FALSE	0	UNCHECKED
IV	WBGene00006780	unc-44	FALSE	FALSE	FALSE	FALSE	0	FALSE	FALSE	FALSE	FALSE	FALSE	0	UNCHECKED
II	WBGene00006787	unc-52	FALSE	FALSE	FALSE	FALSE	0	FALSE	FALSE	FALSE	FALSE	FALSE	0	UNCHECKED
I	WBGene00006819	unc-87	FALSE	FALSE	FALSE	FALSE	0	FALSE	FALSE	FALSE	FALSE	FALSE	0	UNCHECKED
III	WBGene00006911	vha-2	FALSE	FALSE	FALSE	FALSE	0	FALSE	FALSE	FALSE	FALSE	FALSE	0	UNCHECKED
IV	WBGene00006912	vha-3	FALSE	FALSE	FALSE	FALSE	0	FALSE	FALSE	FALSE	FALSE	FALSE	0	UNCHECKED
II	WBGene00006915	vha-6	FALSE	FALSE	FALSE	FALSE	0	FALSE	FALSE	FALSE	FALSE	FALSE	0	UNCHECKED
IV	WBGene00006917	vha-8	FALSE	FALSE	FALSE	FALSE	0	FALSE	FALSE	FALSE	FALSE	FALSE	0	UNCHECKED
II	WBGene00006918	vha-9	FALSE	FALSE	FALSE	FALSE	0	FALSE	FALSE	FALSE	FALSE	FALSE	0	UNCHECKED
I	WBGene00006919	vha-10	FALSE	FALSE	FALSE	FALSE	0	FALSE	FALSE	FALSE	FALSE	FALSE	0	UNCHECKED
X	WBGene00006921	vha-12	FALSE	FALSE	FALSE	FALSE	0	FALSE	FALSE	FALSE	FALSE	FALSE	0	UNCHECKED
I	WBGene00006936	glp-4	FALSE	FALSE	FALSE	FALSE	0	FALSE	FALSE	FALSE	FALSE	FALSE	0	UNCHECKED
III	WBGene00007000	tufm-1	FALSE	FALSE	FALSE	FALSE	0	FALSE	FALSE	FALSE	FALSE	FALSE	0	UNCHECKED
II	WBGene00007142	ttr-18	FALSE	FALSE	FALSE	FALSE	0	FALSE	FALSE	FALSE	FALSE	FALSE	0	UNCHECKED
V	WBGene00007153	clec-41	FALSE	FALSE	FALSE	FALSE	0	FALSE	FALSE	FALSE	FALSE	FALSE	0	UNCHECKED
II	WBGene00007192	nduf-11	FALSE	FALSE	FALSE	FALSE	0	FALSE	FALSE	FALSE	FALSE	FALSE	0	UNCHECKED
IV	WBGene00007307	spch-1	FALSE	FALSE	FALSE	FALSE	0	FALSE	FALSE	FALSE	FALSE	FALSE	0	UNCHECKED
IV	WBGene00007308	nsph-3.2	FALSE	FALSE	FALSE	FALSE	0	FALSE	FALSE	FALSE	FALSE	FALSE	0	UNCHECKED
X	WBGene00007350	sucl-1	FALSE	FALSE	FALSE	FALSE	0	FALSE	FALSE	FALSE	FALSE	FALSE	0	UNCHECKED
II	WBGene00007352	cdc-48.1	FALSE	FALSE	FALSE	FALSE	0	FALSE	FALSE	FALSE	FALSE	FALSE	0	UNCHECKED
V	WBGene00007385	atp-5	FALSE	FALSE	FALSE	FALSE	0	FALSE	FALSE	FALSE	FALSE	FALSE	0	UNCHECKED
IV	WBGene00007443	pfd-1	FALSE	FALSE	FALSE	FALSE	0	FALSE	FALSE	FALSE	FALSE	FALSE	0	UNCHECKED
IV	WBGene00007458	ule-4	FALSE	FALSE	FALSE	FALSE	0	FALSE	FALSE	FALSE	FALSE	FALSE	0	UNCHECKED
II	WBGene00007463	vgln-1	FALSE	FALSE	FALSE	FALSE	0	FALSE	FALSE	FALSE	FALSE	FALSE	0	UNCHECKED
III	WBGene00007630	har-1	FALSE	FALSE	FALSE	FALSE	0	FALSE	FALSE	FALSE	FALSE	FALSE	0	UNCHECKED
II	WBGene00007684	ndub-3	FALSE	FALSE	FALSE	FALSE	0	FALSE	FALSE	FALSE	FALSE	FALSE	0	UNCHECKED
IV	WBGene00007696	tram-1	FALSE	FALSE	FALSE	FALSE	0	FALSE	FALSE	FALSE	FALSE	FALSE	0	UNCHECKED
IV	WBGene00007824	dlat-2	FALSE	FALSE	FALSE	FALSE	0	FALSE	FALSE	FALSE	FALSE	FALSE	0	UNCHECKED
IV	WBGene00007880	ndua-5	FALSE	FALSE	FALSE	FALSE	0	FALSE	FALSE	FALSE	FALSE	FALSE	0	UNCHECKED
IV	WBGene00008149	pyp-1	FALSE	FALSE	FALSE	FALSE	0	FALSE	FALSE	FALSE	FALSE	FALSE	0	UNCHECKED
V	WBGene00008262	ril-1	FALSE	FALSE	FALSE	FALSE	0	FALSE	FALSE	FALSE	FALSE	FALSE	0	UNCHECKED
V	WBGene00008378	ule-3	FALSE	FALSE	FALSE	FALSE	0	FALSE	FALSE	FALSE	FALSE	FALSE	0	UNCHECKED
I	WBGene00008414	ndub-7	FALSE	FALSE	FALSE	FALSE	0	FALSE	FALSE	FALSE	FALSE	FALSE	0	UNCHECKED
IV	WBGene00008505	F01G4.6	FALSE	FALSE	FALSE	FALSE	0	FALSE	FALSE	FALSE	FALSE	FALSE	0	UNCHECKED
IV	WBGene00008506	tkt-1	FALSE	FALSE	FALSE	FALSE	0	FALSE	FALSE	FALSE	FALSE	FALSE	0	UNCHECKED
IV	WBGene00008707	epic-1	FALSE	FALSE	FALSE	FALSE	0	FALSE	FALSE	FALSE	FALSE	FALSE	0	UNCHECKED
II	WBGene00008741	ctsa-1.2	FALSE	FALSE	FALSE	FALSE	0	FALSE	FALSE	FALSE	FALSE	FALSE	0	UNCHECKED
I	WBGene00008768	F13G3.10	FALSE	FALSE	FALSE	FALSE	0	FALSE	FALSE	FALSE	FALSE	FALSE	0	UNCHECKED
I	WBGene00008857	timm-23	FALSE	FALSE	FALSE	FALSE	0	FALSE	FALSE	FALSE	FALSE	FALSE	0	UNCHECKED
X	WBGene00008865	F15G9.1	FALSE	FALSE	FALSE	FALSE	0	FALSE	FALSE	FALSE	FALSE	FALSE	0	UNCHECKED
I	WBGene00009050	mstr-1	FALSE	FALSE	FALSE	FALSE	0	FALSE	FALSE	FALSE	FALSE	FALSE	0	UNCHECKED
II	WBGene00009069	F23A7.4	FALSE	FALSE	FALSE	FALSE	0	FALSE	FALSE	FALSE	FALSE	FALSE	0	UNCHECKED
I	WBGene00009119	ndk-1	FALSE	FALSE	FALSE	FALSE	0	FALSE	FALSE	FALSE	FALSE	FALSE	0	UNCHECKED
I	WBGene00009122	tct-1	FALSE	FALSE	FALSE	FALSE	0	FALSE	FALSE	FALSE	FALSE	FALSE	0	UNCHECKED
I	WBGene00009126	pyk-1	FALSE	FALSE	FALSE	FALSE	0	FALSE	FALSE	FALSE	FALSE	FALSE	0	UNCHECKED
I	WBGene00009161	cox-7C	FALSE	FALSE	FALSE	FALSE	0	FALSE	FALSE	FALSE	FALSE	FALSE	0	UNCHECKED
V	WBGene00009237	F28H7.3	FALSE	FALSE	FALSE	FALSE	0	FALSE	FALSE	FALSE	FALSE	FALSE	0	UNCHECKED
X	WBGene00009259	hpo-34	FALSE	FALSE	FALSE	FALSE	0	FALSE	FALSE	FALSE	FALSE	FALSE	0	UNCHECKED
V	WBGene00009294	ndua-1	FALSE	FALSE	FALSE	FALSE	0	FALSE	FALSE	FALSE	FALSE	FALSE	0	UNCHECKED
II	WBGene00009353	sdhd-1	FALSE	FALSE	FALSE	FALSE	0	FALSE	FALSE	FALSE	FALSE	FALSE	0	UNCHECKED
II	WBGene00009394	clec-63	FALSE	FALSE	FALSE	FALSE	0	FALSE	FALSE	FALSE	FALSE	FALSE	0	UNCHECKED
V	WBGene00009430	F35E12.6	FALSE	FALSE	FALSE	FALSE	0	FALSE	FALSE	FALSE	FALSE	FALSE	0	UNCHECKED
I	WBGene00009454	F36A2.7	FALSE	FALSE	FALSE	FALSE	0	FALSE	FALSE	FALSE	FALSE	FALSE	0	UNCHECKED
X	WBGene00009621	fipr-21	FALSE	FALSE	FALSE	FALSE	0	FALSE	FALSE	FALSE	FALSE	FALSE	0	UNCHECKED
IV	WBGene00009680	msd-1	FALSE	FALSE	FALSE	FALSE	0	FALSE	FALSE	FALSE	FALSE	FALSE	0	UNCHECKED
IV	WBGene00009682	msd-2	FALSE	FALSE	FALSE	FALSE	0	FALSE	FALSE	FALSE	FALSE	FALSE	0	UNCHECKED
II	WBGene00009688	F44E5.1	FALSE	FALSE	FALSE	FALSE	0	FALSE	FALSE	FALSE	FALSE	FALSE	0	UNCHECKED
II	WBGene00009712	ndub-2	FALSE	FALSE	FALSE	FALSE	0	FALSE	FALSE	FALSE	FALSE	FALSE	0	UNCHECKED
II	WBGene00009739	F45H10.2	FALSE	FALSE	FALSE	FALSE	0	FALSE	FALSE	FALSE	FALSE	FALSE	0	UNCHECKED
II	WBGene00009740	ndua-7	FALSE	FALSE	FALSE	FALSE	0	FALSE	FALSE	FALSE	FALSE	FALSE	0	UNCHECKED
V	WBGene00009772	ztf-7	FALSE	FALSE	FALSE	FALSE	0	FALSE	FALSE	FALSE	FALSE	FALSE	0	UNCHECKED
II	WBGene00009783	rer-1	FALSE	FALSE	FALSE	FALSE	0	FALSE	FALSE	FALSE	FALSE	FALSE	0	UNCHECKED
X	WBGene00009796	F46G10.1	FALSE	FALSE	FALSE	FALSE	0	FALSE	FALSE	FALSE	FALSE	FALSE	0	UNCHECKED
X	WBGene00009812	suca-1	FALSE	FALSE	FALSE	FALSE	0	FALSE	FALSE	FALSE	FALSE	FALSE	0	UNCHECKED
IV	WBGene00009881	F49C12.12	FALSE	FALSE	FALSE	FALSE	0	FALSE	FALSE	FALSE	FALSE	FALSE	0	UNCHECKED
III	WBGene00009952	acaa-2	FALSE	FALSE	FALSE	FALSE	0	FALSE	FALSE	FALSE	FALSE	FALSE	0	UNCHECKED
II	WBGene00010041	F54C9.3	FALSE	FALSE	FALSE	FALSE	0	FALSE	FALSE	FALSE	FALSE	FALSE	0	UNCHECKED
II	WBGene00010049	F54D5.3	FALSE	FALSE	FALSE	FALSE	0	FALSE	FALSE	FALSE	FALSE	FALSE	0	UNCHECKED
II	WBGene00010050	F54D5.4	FALSE	FALSE	FALSE	FALSE	0	FALSE	FALSE	FALSE	FALSE	FALSE	0	UNCHECKED
II	WBGene00010055	dhgd-1	FALSE	FALSE	FALSE	FALSE	0	FALSE	FALSE	FALSE	FALSE	FALSE	0	UNCHECKED
II	WBGene00010070	nep-17	FALSE	FALSE	FALSE	FALSE	0	FALSE	FALSE	FALSE	FALSE	FALSE	0	UNCHECKED
III	WBGene00010130	vha-14	FALSE	FALSE	FALSE	FALSE	0	FALSE	FALSE	FALSE	FALSE	FALSE	0	UNCHECKED
I	WBGene00010135	F55H12.4	FALSE	FALSE	FALSE	FALSE	0	FALSE	FALSE	FALSE	FALSE	FALSE	0	UNCHECKED
V	WBGene00010174	F56H9.2	FALSE	FALSE	FALSE	FALSE	0	FALSE	FALSE	FALSE	FALSE	FALSE	0	UNCHECKED
V	WBGene00010204	cpr-9	FALSE	FALSE	FALSE	FALSE	0	FALSE	FALSE	FALSE	FALSE	FALSE	0	UNCHECKED
II	WBGene00010266	dct-18	FALSE	FALSE	FALSE	FALSE	0	FALSE	FALSE	FALSE	FALSE	FALSE	0	UNCHECKED
III	WBGene00010303	cri-3	FALSE	FALSE	FALSE	FALSE	0	FALSE	FALSE	FALSE	FALSE	FALSE	0	UNCHECKED
IV	WBGene00010317	idh-1	FALSE	FALSE	FALSE	FALSE	0	FALSE	FALSE	FALSE	FALSE	FALSE	0	UNCHECKED
I	WBGene00010326	ndub-10	FALSE	FALSE	FALSE	FALSE	0	FALSE	FALSE	FALSE	FALSE	FALSE	0	UNCHECKED
I	WBGene00010419	atp-1	FALSE	FALSE	FALSE	FALSE	0	FALSE	FALSE	FALSE	FALSE	FALSE	0	UNCHECKED
X	WBGene00010424	lep-5	FALSE	FALSE	FALSE	FALSE	0	FALSE	FALSE	FALSE	FALSE	FALSE	0	UNCHECKED
III	WBGene00010539	ttr-2	FALSE	FALSE	FALSE	FALSE	0	FALSE	FALSE	FALSE	FALSE	FALSE	0	UNCHECKED
IV	WBGene00010556	rack-1	FALSE	FALSE	FALSE	FALSE	0	FALSE	FALSE	FALSE	FALSE	FALSE	0	UNCHECKED
I	WBGene00010560	eif-2beta	FALSE	FALSE	FALSE	FALSE	0	FALSE	FALSE	FALSE	FALSE	FALSE	0	UNCHECKED
I	WBGene00010579	K05C4.2	FALSE	FALSE	FALSE	FALSE	0	FALSE	FALSE	FALSE	FALSE	FALSE	0	UNCHECKED
V	WBGene00010597	K06A4.7	FALSE	FALSE	FALSE	FALSE	0	FALSE	FALSE	FALSE	FALSE	FALSE	0	UNCHECKED
V	WBGene00010627	nol-56	FALSE	FALSE	FALSE	FALSE	0	FALSE	FALSE	FALSE	FALSE	FALSE	0	UNCHECKED
IV	WBGene00010633	nspd-2	FALSE	FALSE	FALSE	FALSE	0	FALSE	FALSE	FALSE	FALSE	FALSE	0	UNCHECKED
III	WBGene00010665	rml-1	FALSE	FALSE	FALSE	FALSE	0	FALSE	FALSE	FALSE	FALSE	FALSE	0	UNCHECKED
V	WBGene00010727	K09G1.1	FALSE	FALSE	FALSE	FALSE	0	FALSE	FALSE	FALSE	FALSE	FALSE	0	UNCHECKED
IV	WBGene00010794	dld-1	FALSE	FALSE	FALSE	FALSE	0	FALSE	FALSE	FALSE	FALSE	FALSE	0	UNCHECKED
II	WBGene00010896	snu-13	FALSE	FALSE	FALSE	FALSE	0	FALSE	FALSE	FALSE	FALSE	FALSE	0	UNCHECKED
III	WBGene00010904	ugt-62	FALSE	FALSE	FALSE	FALSE	0	FALSE	FALSE	FALSE	FALSE	FALSE	0	UNCHECKED
X	WBGene00010993	vha-20	FALSE	FALSE	FALSE	FALSE	0	FALSE	FALSE	FALSE	FALSE	FALSE	0	UNCHECKED
V	WBGene00011015	R04F11.2	FALSE	FALSE	FALSE	FALSE	0	FALSE	FALSE	FALSE	FALSE	FALSE	0	UNCHECKED
X	WBGene00011102	R07E3.1	FALSE	FALSE	FALSE	FALSE	0	FALSE	FALSE	FALSE	FALSE	FALSE	0	UNCHECKED
III	WBGene00011110	prdx-3	FALSE	FALSE	FALSE	FALSE	0	FALSE	FALSE	FALSE	FALSE	FALSE	0	UNCHECKED
II	WBGene00011273	R53.4	FALSE	FALSE	FALSE	FALSE	0	FALSE	FALSE	FALSE	FALSE	FALSE	0	UNCHECKED
V	WBGene00011330	T01D3.6	FALSE	FALSE	FALSE	FALSE	0	FALSE	FALSE	FALSE	FALSE	FALSE	0	UNCHECKED
X	WBGene00011446	T04F8.8	FALSE	FALSE	FALSE	FALSE	0	FALSE	FALSE	FALSE	FALSE	FALSE	0	UNCHECKED
III	WBGene00011474	aldo-1	FALSE	FALSE	FALSE	FALSE	0	FALSE	FALSE	FALSE	FALSE	FALSE	0	UNCHECKED
II	WBGene00011510	pdha-1	FALSE	FALSE	FALSE	FALSE	0	FALSE	FALSE	FALSE	FALSE	FALSE	0	UNCHECKED
III	WBGene00011561	ttr-15	FALSE	FALSE	FALSE	FALSE	0	FALSE	FALSE	FALSE	FALSE	FALSE	0	UNCHECKED
V	WBGene00011571	ttr-46	FALSE	FALSE	FALSE	FALSE	0	FALSE	FALSE	FALSE	FALSE	FALSE	0	UNCHECKED
IV	WBGene00011856	nspg-7.1	FALSE	FALSE	FALSE	FALSE	0	FALSE	FALSE	FALSE	FALSE	FALSE	0	UNCHECKED
III	WBGene00011867	chc-1	FALSE	FALSE	FALSE	FALSE	0	FALSE	FALSE	FALSE	FALSE	FALSE	0	UNCHECKED
II	WBGene00011884	enol-1	FALSE	FALSE	FALSE	FALSE	0	FALSE	FALSE	FALSE	FALSE	FALSE	0	UNCHECKED
IV	WBGene00012015	T25B9.9	FALSE	FALSE	FALSE	FALSE	0	FALSE	FALSE	FALSE	FALSE	FALSE	0	UNCHECKED
X	WBGene00012018	T25C12.3	FALSE	FALSE	FALSE	FALSE	0	FALSE	FALSE	FALSE	FALSE	FALSE	0	UNCHECKED
III	WBGene00012094	T27E9.2	FALSE	FALSE	FALSE	FALSE	0	FALSE	FALSE	FALSE	FALSE	FALSE	0	UNCHECKED
X	WBGene00012158	ucr-2.1	FALSE	FALSE	FALSE	FALSE	0	FALSE	FALSE	FALSE	FALSE	FALSE	0	UNCHECKED
I	WBGene00012166	nuo-6	FALSE	FALSE	FALSE	FALSE	0	FALSE	FALSE	FALSE	FALSE	FALSE	0	UNCHECKED
II	WBGene00012179	rpl-37.1	FALSE	FALSE	FALSE	FALSE	0	FALSE	FALSE	FALSE	FALSE	FALSE	0	UNCHECKED
V	WBGene00012253	clec-50	FALSE	FALSE	FALSE	FALSE	0	FALSE	FALSE	FALSE	FALSE	FALSE	0	UNCHECKED
I	WBGene00012344	ola-1	FALSE	FALSE	FALSE	FALSE	0	FALSE	FALSE	FALSE	FALSE	FALSE	0	UNCHECKED
I	WBGene00012351	W09C5.1	FALSE	FALSE	FALSE	FALSE	0	FALSE	FALSE	FALSE	FALSE	FALSE	0	UNCHECKED
I	WBGene00012354	cox-4	FALSE	FALSE	FALSE	FALSE	0	FALSE	FALSE	FALSE	FALSE	FALSE	0	UNCHECKED
I	WBGene00012376	nduf-7	FALSE	FALSE	FALSE	FALSE	0	FALSE	FALSE	FALSE	FALSE	FALSE	0	UNCHECKED
III	WBGene00012553	cox-5A	FALSE	FALSE	FALSE	FALSE	0	FALSE	FALSE	FALSE	FALSE	FALSE	0	UNCHECKED
II	WBGene00012602	Y38E10A.24	FALSE	FALSE	FALSE	FALSE	0	FALSE	FALSE	FALSE	FALSE	FALSE	0	UNCHECKED
II	WBGene00012608	hphd-1	FALSE	FALSE	FALSE	FALSE	0	FALSE	FALSE	FALSE	FALSE	FALSE	0	UNCHECKED
V	WBGene00012615	dct-16	FALSE	FALSE	FALSE	FALSE	0	FALSE	FALSE	FALSE	FALSE	FALSE	0	UNCHECKED
V	WBGene00012664	Y39B6A.1	FALSE	FALSE	FALSE	FALSE	0	FALSE	FALSE	FALSE	FALSE	FALSE	0	UNCHECKED
III	WBGene00012713	bckd-1A	FALSE	FALSE	FALSE	FALSE	0	FALSE	FALSE	FALSE	FALSE	FALSE	0	UNCHECKED
IV	WBGene00012768	eef-1B.2	FALSE	FALSE	FALSE	FALSE	0	FALSE	FALSE	FALSE	FALSE	FALSE	0	UNCHECKED
IV	WBGene00012781	nspd-7	FALSE	FALSE	FALSE	FALSE	0	FALSE	FALSE	FALSE	FALSE	FALSE	0	UNCHECKED
III	WBGene00012964	Y48A6B.3	FALSE	FALSE	FALSE	FALSE	0	FALSE	FALSE	FALSE	FALSE	FALSE	0	UNCHECKED
V	WBGene00013025	vha-13	FALSE	FALSE	FALSE	FALSE	0	FALSE	FALSE	FALSE	FALSE	FALSE	0	UNCHECKED
V	WBGene00013077	ttr-24	FALSE	FALSE	FALSE	FALSE	0	FALSE	FALSE	FALSE	FALSE	FALSE	0	UNCHECKED
II	WBGene00013094	ndub-8	FALSE	FALSE	FALSE	FALSE	0	FALSE	FALSE	FALSE	FALSE	FALSE	0	UNCHECKED
II	WBGene00013144	pno-1	FALSE	FALSE	FALSE	FALSE	0	FALSE	FALSE	FALSE	FALSE	FALSE	0	UNCHECKED
III	WBGene00013237	ndab-1	FALSE	FALSE	FALSE	FALSE	0	FALSE	FALSE	FALSE	FALSE	FALSE	0	UNCHECKED
III	WBGene00013238	trap-4	FALSE	FALSE	FALSE	FALSE	0	FALSE	FALSE	FALSE	FALSE	FALSE	0	UNCHECKED
IV	WBGene00013311	sec-61.A	FALSE	FALSE	FALSE	FALSE	0	FALSE	FALSE	FALSE	FALSE	FALSE	0	UNCHECKED
V	WBGene00013340	tcc-1	FALSE	FALSE	FALSE	FALSE	0	FALSE	FALSE	FALSE	FALSE	FALSE	0	UNCHECKED
I	WBGene00013406	ndua-2	FALSE	FALSE	FALSE	FALSE	0	FALSE	FALSE	FALSE	FALSE	FALSE	0	UNCHECKED
IV	WBGene00013463	kdp-1	FALSE	FALSE	FALSE	FALSE	0	FALSE	FALSE	FALSE	FALSE	FALSE	0	UNCHECKED
IV	WBGene00013474	nsph-3.1	FALSE	FALSE	FALSE	FALSE	0	FALSE	FALSE	FALSE	FALSE	FALSE	0	UNCHECKED
V	WBGene00013489	col-42	FALSE	FALSE	FALSE	FALSE	0	FALSE	FALSE	FALSE	FALSE	FALSE	0	UNCHECKED
I	WBGene00013690	hprt-1	FALSE	FALSE	FALSE	FALSE	0	FALSE	FALSE	FALSE	FALSE	FALSE	0	UNCHECKED
II	WBGene00013924	rad-23	FALSE	FALSE	FALSE	FALSE	0	FALSE	FALSE	FALSE	FALSE	FALSE	0	UNCHECKED
III	WBGene00014016	ZK632.9	FALSE	FALSE	FALSE	FALSE	0	FALSE	FALSE	FALSE	FALSE	FALSE	0	UNCHECKED
IV	WBGene00014095	gdh-1	FALSE	FALSE	FALSE	FALSE	0	FALSE	FALSE	FALSE	FALSE	FALSE	0	UNCHECKED
III	WBGene00014204	ccdc-47	FALSE	FALSE	FALSE	FALSE	0	FALSE	FALSE	FALSE	FALSE	FALSE	0	UNCHECKED
II	WBGene00014252	ZK1320.2	FALSE	FALSE	FALSE	FALSE	0	FALSE	FALSE	FALSE	FALSE	FALSE	0	UNCHECKED
II	WBGene00014253	ZK1320.3	FALSE	FALSE	FALSE	FALSE	0	FALSE	FALSE	FALSE	FALSE	FALSE	0	UNCHECKED
II	WBGene00014307	F07H5.3	FALSE	FALSE	FALSE	FALSE	0	FALSE	FALSE	FALSE	FALSE	FALSE	0	UNCHECKED
II	WBGene00014309	F07H5.5	FALSE	FALSE	FALSE	FALSE	0	FALSE	FALSE	FALSE	FALSE	FALSE	0	UNCHECKED
IV	WBGene00014505	T05E11.9	FALSE	FALSE	FALSE	FALSE	0	FALSE	FALSE	FALSE	FALSE	FALSE	0	UNCHECKED
X	WBGene00015168	pdi-6	FALSE	FALSE	FALSE	FALSE	0	FALSE	FALSE	FALSE	FALSE	FALSE	0	UNCHECKED
IV	WBGene00015248	mai-2	FALSE	FALSE	FALSE	FALSE	0	FALSE	FALSE	FALSE	FALSE	FALSE	0	UNCHECKED
IV	WBGene00015413	pdhb-1	FALSE	FALSE	FALSE	FALSE	0	FALSE	FALSE	FALSE	FALSE	FALSE	0	UNCHECKED
II	WBGene00015514	srlf-1	FALSE	FALSE	FALSE	FALSE	0	FALSE	FALSE	FALSE	FALSE	FALSE	0	UNCHECKED
X	WBGene00015565	C07D8.6	FALSE	FALSE	FALSE	FALSE	0	FALSE	FALSE	FALSE	FALSE	FALSE	0	UNCHECKED
III	WBGene00015755	C14B9.10	FALSE	FALSE	FALSE	FALSE	0	FALSE	FALSE	FALSE	FALSE	FALSE	0	UNCHECKED
X	WBGene00015778	got-2.2	FALSE	FALSE	FALSE	FALSE	0	FALSE	FALSE	FALSE	FALSE	FALSE	0	UNCHECKED
III	WBGene00015810	C16A3.5	FALSE	FALSE	FALSE	FALSE	0	FALSE	FALSE	FALSE	FALSE	FALSE	0	UNCHECKED
III	WBGene00015814	oatr-1	FALSE	FALSE	FALSE	FALSE	0	FALSE	FALSE	FALSE	FALSE	FALSE	0	UNCHECKED
X	WBGene00015823	C16B8.3	FALSE	FALSE	FALSE	FALSE	0	FALSE	FALSE	FALSE	FALSE	FALSE	0	UNCHECKED
II	WBGene00015913	C17F4.7	FALSE	FALSE	FALSE	FALSE	0	FALSE	FALSE	FALSE	FALSE	FALSE	0	UNCHECKED
III	WBGene00016011	C23G10.2	FALSE	FALSE	FALSE	FALSE	0	FALSE	FALSE	FALSE	FALSE	FALSE	0	UNCHECKED
IV	WBGene00016058	nspd-3	FALSE	FALSE	FALSE	FALSE	0	FALSE	FALSE	FALSE	FALSE	FALSE	0	UNCHECKED
II	WBGene00016118	ndub-5	FALSE	FALSE	FALSE	FALSE	0	FALSE	FALSE	FALSE	FALSE	FALSE	0	UNCHECKED
III	WBGene00016195	erd-2.2	FALSE	FALSE	FALSE	FALSE	0	FALSE	FALSE	FALSE	FALSE	FALSE	0	UNCHECKED
III	WBGene00016250	hsp-110	FALSE	FALSE	FALSE	FALSE	0	FALSE	FALSE	FALSE	FALSE	FALSE	0	UNCHECKED
I	WBGene00016258	vha-16	FALSE	FALSE	FALSE	FALSE	0	FALSE	FALSE	FALSE	FALSE	FALSE	0	UNCHECKED
II	WBGene00016274	C30G12.2	FALSE	FALSE	FALSE	FALSE	0	FALSE	FALSE	FALSE	FALSE	FALSE	0	UNCHECKED
I	WBGene00016333	C32F10.8	FALSE	FALSE	FALSE	FALSE	0	FALSE	FALSE	FALSE	FALSE	FALSE	0	UNCHECKED
I	WBGene00016393	ndua-13	FALSE	FALSE	FALSE	FALSE	0	FALSE	FALSE	FALSE	FALSE	FALSE	0	UNCHECKED
IV	WBGene00016435	C35B1.5	FALSE	FALSE	FALSE	FALSE	0	FALSE	FALSE	FALSE	FALSE	FALSE	0	UNCHECKED
III	WBGene00016447	msd-4	FALSE	FALSE	FALSE	FALSE	0	FALSE	FALSE	FALSE	FALSE	FALSE	0	UNCHECKED
I	WBGene00016493	rplp-2.1	FALSE	FALSE	FALSE	FALSE	0	FALSE	FALSE	FALSE	FALSE	FALSE	0	UNCHECKED
V	WBGene00016509	adss-1	FALSE	FALSE	FALSE	FALSE	0	FALSE	FALSE	FALSE	FALSE	FALSE	0	UNCHECKED
IV	WBGene00016594	srlf-7	FALSE	FALSE	FALSE	FALSE	0	FALSE	FALSE	FALSE	FALSE	FALSE	0	UNCHECKED
II	WBGene00016630	acer-1	FALSE	FALSE	FALSE	FALSE	0	FALSE	FALSE	FALSE	FALSE	FALSE	0	UNCHECKED
I	WBGene00016655	acbp-1	FALSE	FALSE	FALSE	FALSE	0	FALSE	FALSE	FALSE	FALSE	FALSE	0	UNCHECKED
X	WBGene00016658	spig-20	FALSE	FALSE	FALSE	FALSE	0	FALSE	FALSE	FALSE	FALSE	FALSE	0	UNCHECKED
I	WBGene00016746	C48B6.10	FALSE	FALSE	FALSE	FALSE	0	FALSE	FALSE	FALSE	FALSE	FALSE	0	UNCHECKED
IV	WBGene00016790	C49H3.3	FALSE	FALSE	FALSE	FALSE	0	FALSE	FALSE	FALSE	FALSE	FALSE	0	UNCHECKED
IV	WBGene00016918	test-1	FALSE	FALSE	FALSE	FALSE	0	FALSE	FALSE	FALSE	FALSE	FALSE	0	UNCHECKED
I	WBGene00016943	acdh-1	FALSE	FALSE	FALSE	FALSE	0	FALSE	FALSE	FALSE	FALSE	FALSE	0	UNCHECKED
IV	WBGene00017075	nap-1	FALSE	FALSE	FALSE	FALSE	0	FALSE	FALSE	FALSE	FALSE	FALSE	0	UNCHECKED
IV	WBGene00017121	cyc-2.1	FALSE	FALSE	FALSE	FALSE	0	FALSE	FALSE	FALSE	FALSE	FALSE	0	UNCHECKED
III	WBGene00017166	aldo-2	FALSE	FALSE	FALSE	FALSE	0	FALSE	FALSE	FALSE	FALSE	FALSE	0	UNCHECKED
II	WBGene00017374	ttr-41	FALSE	FALSE	FALSE	FALSE	0	FALSE	FALSE	FALSE	FALSE	FALSE	0	UNCHECKED
II	WBGene00017386	nspd-5	FALSE	FALSE	FALSE	FALSE	0	FALSE	FALSE	FALSE	FALSE	FALSE	0	UNCHECKED
II	WBGene00017440	upb-1	FALSE	FALSE	FALSE	FALSE	0	FALSE	FALSE	FALSE	FALSE	FALSE	0	UNCHECKED
V	WBGene00017506	F16B4.4	FALSE	FALSE	FALSE	FALSE	0	FALSE	FALSE	FALSE	FALSE	FALSE	0	UNCHECKED
IV	WBGene00017542	F17E9.5	FALSE	FALSE	FALSE	FALSE	0	FALSE	FALSE	FALSE	FALSE	FALSE	0	UNCHECKED
IV	WBGene00017591	nspg-10	FALSE	FALSE	FALSE	FALSE	0	FALSE	FALSE	FALSE	FALSE	FALSE	0	UNCHECKED
X	WBGene00017691	ilys-5	FALSE	FALSE	FALSE	FALSE	0	FALSE	FALSE	FALSE	FALSE	FALSE	0	UNCHECKED
V	WBGene00017719	ldp-1	FALSE	FALSE	FALSE	FALSE	0	FALSE	FALSE	FALSE	FALSE	FALSE	0	UNCHECKED
X	WBGene00017727	F22H10.3	FALSE	FALSE	FALSE	FALSE	0	FALSE	FALSE	FALSE	FALSE	FALSE	0	UNCHECKED
V	WBGene00017772	clec-1	FALSE	FALSE	FALSE	FALSE	0	FALSE	FALSE	FALSE	FALSE	FALSE	0	UNCHECKED
V	WBGene00017881	asp-13	FALSE	FALSE	FALSE	FALSE	0	FALSE	FALSE	FALSE	FALSE	FALSE	0	UNCHECKED
IV	WBGene00017925	F29B9.11	FALSE	FALSE	FALSE	FALSE	0	FALSE	FALSE	FALSE	FALSE	FALSE	0	UNCHECKED
IV	WBGene00017926	cox-6C	FALSE	FALSE	FALSE	FALSE	0	FALSE	FALSE	FALSE	FALSE	FALSE	0	UNCHECKED
V	WBGene00017982	hpo-18	FALSE	FALSE	FALSE	FALSE	0	FALSE	FALSE	FALSE	FALSE	FALSE	0	UNCHECKED
V	WBGene00017984	gmpr-1	FALSE	FALSE	FALSE	FALSE	0	FALSE	FALSE	FALSE	FALSE	FALSE	0	UNCHECKED
V	WBGene00018138	folt-2	FALSE	FALSE	FALSE	FALSE	0	FALSE	FALSE	FALSE	FALSE	FALSE	0	UNCHECKED
III	WBGene00018151	ndab-2	FALSE	FALSE	FALSE	FALSE	0	FALSE	FALSE	FALSE	FALSE	FALSE	0	UNCHECKED
X	WBGene00018237	irg-7	FALSE	FALSE	FALSE	FALSE	0	FALSE	FALSE	FALSE	FALSE	FALSE	0	UNCHECKED
II	WBGene00018271	ctsa-1.1	FALSE	FALSE	FALSE	FALSE	0	FALSE	FALSE	FALSE	FALSE	FALSE	0	UNCHECKED
III	WBGene00018341	F42A10.5	FALSE	FALSE	FALSE	FALSE	0	FALSE	FALSE	FALSE	FALSE	FALSE	0	UNCHECKED
IV	WBGene00018361	ndub-11	FALSE	FALSE	FALSE	FALSE	0	FALSE	FALSE	FALSE	FALSE	FALSE	0	UNCHECKED
V	WBGene00018491	mdh-1	FALSE	FALSE	FALSE	FALSE	0	FALSE	FALSE	FALSE	FALSE	FALSE	0	UNCHECKED
X	WBGene00018519	F46H5.3	FALSE	FALSE	FALSE	FALSE	0	FALSE	FALSE	FALSE	FALSE	FALSE	0	UNCHECKED
X	WBGene00018522	F46H5.7	FALSE	FALSE	FALSE	FALSE	0	FALSE	FALSE	FALSE	FALSE	FALSE	0	UNCHECKED
I	WBGene00018765	mpc-2	FALSE	FALSE	FALSE	FALSE	0	FALSE	FALSE	FALSE	FALSE	FALSE	0	UNCHECKED
II	WBGene00018782	cct-3	FALSE	FALSE	FALSE	FALSE	0	FALSE	FALSE	FALSE	FALSE	FALSE	0	UNCHECKED
II	WBGene00018784	F54A3.5	FALSE	FALSE	FALSE	FALSE	0	FALSE	FALSE	FALSE	FALSE	FALSE	0	UNCHECKED
V	WBGene00018811	pmt-2	FALSE	FALSE	FALSE	FALSE	0	FALSE	FALSE	FALSE	FALSE	FALSE	0	UNCHECKED
V	WBGene00018823	F54E2.1	FALSE	FALSE	FALSE	FALSE	0	FALSE	FALSE	FALSE	FALSE	FALSE	0	UNCHECKED
III	WBGene00018846	eef-1B.1	FALSE	FALSE	FALSE	FALSE	0	FALSE	FALSE	FALSE	FALSE	FALSE	0	UNCHECKED
IV	WBGene00018934	F56B3.11	FALSE	FALSE	FALSE	FALSE	0	FALSE	FALSE	FALSE	FALSE	FALSE	0	UNCHECKED
III	WBGene00018963	ucr-1	FALSE	FALSE	FALSE	FALSE	0	FALSE	FALSE	FALSE	FALSE	FALSE	0	UNCHECKED
X	WBGene00018984	F56F10.1	FALSE	FALSE	FALSE	FALSE	0	FALSE	FALSE	FALSE	FALSE	FALSE	0	UNCHECKED
I	WBGene00019001	ipgm-1	FALSE	FALSE	FALSE	FALSE	0	FALSE	FALSE	FALSE	FALSE	FALSE	0	UNCHECKED
I	WBGene00019007	ucr-11	FALSE	FALSE	FALSE	FALSE	0	FALSE	FALSE	FALSE	FALSE	FALSE	0	UNCHECKED
V	WBGene00019017	bcf-1	FALSE	FALSE	FALSE	FALSE	0	FALSE	FALSE	FALSE	FALSE	FALSE	0	UNCHECKED
II	WBGene00019026	F58A6.9	FALSE	FALSE	FALSE	FALSE	0	FALSE	FALSE	FALSE	FALSE	FALSE	0	UNCHECKED
II	WBGene00019061	F58F12.1	FALSE	FALSE	FALSE	FALSE	0	FALSE	FALSE	FALSE	FALSE	FALSE	0	UNCHECKED
V	WBGene00019097	F59B1.2	FALSE	FALSE	FALSE	FALSE	0	FALSE	FALSE	FALSE	FALSE	FALSE	0	UNCHECKED
IV	WBGene00019162	eif-1.A	FALSE	FALSE	FALSE	FALSE	0	FALSE	FALSE	FALSE	FALSE	FALSE	0	UNCHECKED
I	WBGene00019322	ahcy-1	FALSE	FALSE	FALSE	FALSE	0	FALSE	FALSE	FALSE	FALSE	FALSE	0	UNCHECKED
III	WBGene00019333	moma-1	FALSE	FALSE	FALSE	FALSE	0	FALSE	FALSE	FALSE	FALSE	FALSE	0	UNCHECKED
III	WBGene00019401	nuo-4	FALSE	FALSE	FALSE	FALSE	0	FALSE	FALSE	FALSE	FALSE	FALSE	0	UNCHECKED
IV	WBGene00019543	cif-1	FALSE	FALSE	FALSE	FALSE	0	FALSE	FALSE	FALSE	FALSE	FALSE	0	UNCHECKED
X	WBGene00019617	ctsa-2	FALSE	FALSE	FALSE	FALSE	0	FALSE	FALSE	FALSE	FALSE	FALSE	0	UNCHECKED
X	WBGene00019619	asp-14	FALSE	FALSE	FALSE	FALSE	0	FALSE	FALSE	FALSE	FALSE	FALSE	0	UNCHECKED
X	WBGene00019620	fah-1	FALSE	FALSE	FALSE	FALSE	0	FALSE	FALSE	FALSE	FALSE	FALSE	0	UNCHECKED
III	WBGene00019680	K12H4.5	FALSE	FALSE	FALSE	FALSE	0	FALSE	FALSE	FALSE	FALSE	FALSE	0	UNCHECKED
I	WBGene00019713	pqn-52	FALSE	FALSE	FALSE	FALSE	0	FALSE	FALSE	FALSE	FALSE	FALSE	0	UNCHECKED
X	WBGene00019727	zig-12	FALSE	FALSE	FALSE	FALSE	0	FALSE	FALSE	FALSE	FALSE	FALSE	0	UNCHECKED
X	WBGene00019760	calu-1	FALSE	FALSE	FALSE	FALSE	0	FALSE	FALSE	FALSE	FALSE	FALSE	0	UNCHECKED
III	WBGene00019831	R02F2.1	FALSE	FALSE	FALSE	FALSE	0	FALSE	FALSE	FALSE	FALSE	FALSE	0	UNCHECKED
II	WBGene00019890	pgm-1	FALSE	FALSE	FALSE	FALSE	0	FALSE	FALSE	FALSE	FALSE	FALSE	0	UNCHECKED
II	WBGene00019893	sgt-1	FALSE	FALSE	FALSE	FALSE	0	FALSE	FALSE	FALSE	FALSE	FALSE	0	UNCHECKED
II	WBGene00019895	aagr-2	FALSE	FALSE	FALSE	FALSE	0	FALSE	FALSE	FALSE	FALSE	FALSE	0	UNCHECKED
IV	WBGene00019900	vdac-1	FALSE	FALSE	FALSE	FALSE	0	FALSE	FALSE	FALSE	FALSE	FALSE	0	UNCHECKED
III	WBGene00019914	clec-150	FALSE	FALSE	FALSE	FALSE	0	FALSE	FALSE	FALSE	FALSE	FALSE	0	UNCHECKED
X	WBGene00019937	R07E4.3	FALSE	FALSE	FALSE	FALSE	0	FALSE	FALSE	FALSE	FALSE	FALSE	0	UNCHECKED
V	WBGene00019983	sti-1	FALSE	FALSE	FALSE	FALSE	0	FALSE	FALSE	FALSE	FALSE	FALSE	0	UNCHECKED
III	WBGene00020107	prps-1	FALSE	FALSE	FALSE	FALSE	0	FALSE	FALSE	FALSE	FALSE	FALSE	0	UNCHECKED
III	WBGene00020112	pfd-5	FALSE	FALSE	FALSE	FALSE	0	FALSE	FALSE	FALSE	FALSE	FALSE	0	UNCHECKED
IV	WBGene00020139	eppl-1	FALSE	FALSE	FALSE	FALSE	0	FALSE	FALSE	FALSE	FALSE	FALSE	0	UNCHECKED
II	WBGene00020166	T02G5.7	FALSE	FALSE	FALSE	FALSE	0	FALSE	FALSE	FALSE	FALSE	FALSE	0	UNCHECKED
II	WBGene00020181	T02H6.11	FALSE	FALSE	FALSE	FALSE	0	FALSE	FALSE	FALSE	FALSE	FALSE	0	UNCHECKED
I	WBGene00020185	pgk-1	FALSE	FALSE	FALSE	FALSE	0	FALSE	FALSE	FALSE	FALSE	FALSE	0	UNCHECKED
X	WBGene00020216	trap-2	FALSE	FALSE	FALSE	FALSE	0	FALSE	FALSE	FALSE	FALSE	FALSE	0	UNCHECKED
V	WBGene00020268	hpo-19	FALSE	FALSE	FALSE	FALSE	0	FALSE	FALSE	FALSE	FALSE	FALSE	0	UNCHECKED
V	WBGene00020269	erfa-1	FALSE	FALSE	FALSE	FALSE	0	FALSE	FALSE	FALSE	FALSE	FALSE	0	UNCHECKED
V	WBGene00020275	atp-4	FALSE	FALSE	FALSE	FALSE	0	FALSE	FALSE	FALSE	FALSE	FALSE	0	UNCHECKED
I	WBGene00020347	ech-1.2	FALSE	FALSE	FALSE	FALSE	0	FALSE	FALSE	FALSE	FALSE	FALSE	0	UNCHECKED
V	WBGene00020369	exc-15	FALSE	FALSE	FALSE	FALSE	0	FALSE	FALSE	FALSE	FALSE	FALSE	0	UNCHECKED
I	WBGene00020417	nuo-2	FALSE	FALSE	FALSE	FALSE	0	FALSE	FALSE	FALSE	FALSE	FALSE	0	UNCHECKED
III	WBGene00020437	stt-3	FALSE	FALSE	FALSE	FALSE	0	FALSE	FALSE	FALSE	FALSE	FALSE	0	UNCHECKED
X	WBGene00020507	vha-15	FALSE	FALSE	FALSE	FALSE	0	FALSE	FALSE	FALSE	FALSE	FALSE	0	UNCHECKED
III	WBGene00020636	ndus-8	FALSE	FALSE	FALSE	FALSE	0	FALSE	FALSE	FALSE	FALSE	FALSE	0	UNCHECKED
V	WBGene00020662	T21H3.1	FALSE	FALSE	FALSE	FALSE	0	FALSE	FALSE	FALSE	FALSE	FALSE	0	UNCHECKED
IV	WBGene00020679	ogdh-1	FALSE	FALSE	FALSE	FALSE	0	FALSE	FALSE	FALSE	FALSE	FALSE	0	UNCHECKED
IV	WBGene00020683	ribo-1	FALSE	FALSE	FALSE	FALSE	0	FALSE	FALSE	FALSE	FALSE	FALSE	0	UNCHECKED
V	WBGene00020696	pygl-1	FALSE	FALSE	FALSE	FALSE	0	FALSE	FALSE	FALSE	FALSE	FALSE	0	UNCHECKED
II	WBGene00020715	nspd-4	FALSE	FALSE	FALSE	FALSE	0	FALSE	FALSE	FALSE	FALSE	FALSE	0	UNCHECKED
V	WBGene00020808	clik-1	FALSE	FALSE	FALSE	FALSE	0	FALSE	FALSE	FALSE	FALSE	FALSE	0	UNCHECKED
II	WBGene00020868	eif-1	FALSE	FALSE	FALSE	FALSE	0	FALSE	FALSE	FALSE	FALSE	FALSE	0	UNCHECKED
I	WBGene00020915	nol-58	FALSE	FALSE	FALSE	FALSE	0	FALSE	FALSE	FALSE	FALSE	FALSE	0	UNCHECKED
I	WBGene00020931	cytb-5.2	FALSE	FALSE	FALSE	FALSE	0	FALSE	FALSE	FALSE	FALSE	FALSE	0	UNCHECKED
I	WBGene00021024	W04C9.2	FALSE	FALSE	FALSE	FALSE	0	FALSE	FALSE	FALSE	FALSE	FALSE	0	UNCHECKED
X	WBGene00021050	W05H9.3	FALSE	FALSE	FALSE	FALSE	0	FALSE	FALSE	FALSE	FALSE	FALSE	0	UNCHECKED
IV	WBGene00021088	W08E12.7	FALSE	FALSE	FALSE	FALSE	0	FALSE	FALSE	FALSE	FALSE	FALSE	0	UNCHECKED
I	WBGene00021128	W10C8.5	FALSE	FALSE	FALSE	FALSE	0	FALSE	FALSE	FALSE	FALSE	FALSE	0	UNCHECKED
II	WBGene00021133	tomm-22	FALSE	FALSE	FALSE	FALSE	0	FALSE	FALSE	FALSE	FALSE	FALSE	0	UNCHECKED
III	WBGene00021248	Y22D7AL.10	FALSE	FALSE	FALSE	FALSE	0	FALSE	FALSE	FALSE	FALSE	FALSE	0	UNCHECKED
IV	WBGene00021286	tald-1	FALSE	FALSE	FALSE	FALSE	0	FALSE	FALSE	FALSE	FALSE	FALSE	0	UNCHECKED
X	WBGene00021322	nspg-14	FALSE	FALSE	FALSE	FALSE	0	FALSE	FALSE	FALSE	FALSE	FALSE	0	UNCHECKED
X	WBGene00021325	nspg-13	FALSE	FALSE	FALSE	FALSE	0	FALSE	FALSE	FALSE	FALSE	FALSE	0	UNCHECKED
I	WBGene00021348	moag-4	FALSE	FALSE	FALSE	FALSE	0	FALSE	FALSE	FALSE	FALSE	FALSE	0	UNCHECKED
I	WBGene00021350	rpl-27A	FALSE	FALSE	FALSE	FALSE	0	FALSE	FALSE	FALSE	FALSE	FALSE	0	UNCHECKED
I	WBGene00021351	eif-2alpha	FALSE	FALSE	FALSE	FALSE	0	FALSE	FALSE	FALSE	FALSE	FALSE	0	UNCHECKED
IV	WBGene00021398	Y38C1AA.7	FALSE	FALSE	FALSE	FALSE	0	FALSE	FALSE	FALSE	FALSE	FALSE	0	UNCHECKED
IV	WBGene00021420	trap-3	FALSE	FALSE	FALSE	FALSE	0	FALSE	FALSE	FALSE	FALSE	FALSE	0	UNCHECKED
III	WBGene00021441	Y39A3CL.3	FALSE	FALSE	FALSE	FALSE	0	FALSE	FALSE	FALSE	FALSE	FALSE	0	UNCHECKED
V	WBGene00021486	lbp-9	FALSE	FALSE	FALSE	FALSE	0	FALSE	FALSE	FALSE	FALSE	FALSE	0	UNCHECKED
I	WBGene00021768	Y51F10.7	FALSE	FALSE	FALSE	FALSE	0	FALSE	FALSE	FALSE	FALSE	FALSE	0	UNCHECKED
III	WBGene00021800	nduf-9	FALSE	FALSE	FALSE	FALSE	0	FALSE	FALSE	FALSE	FALSE	FALSE	0	UNCHECKED
I	WBGene00021835	Y54E10A.17	FALSE	FALSE	FALSE	FALSE	0	FALSE	FALSE	FALSE	FALSE	FALSE	0	UNCHECKED
III	WBGene00021849	ndua-8	FALSE	FALSE	FALSE	FALSE	0	FALSE	FALSE	FALSE	FALSE	FALSE	0	UNCHECKED
III	WBGene00021852	Y54F10AM.8	FALSE	FALSE	FALSE	FALSE	0	FALSE	FALSE	FALSE	FALSE	FALSE	0	UNCHECKED
IV	WBGene00021888	manf-1	FALSE	FALSE	FALSE	FALSE	0	FALSE	FALSE	FALSE	FALSE	FALSE	0	UNCHECKED
IV	WBGene00021952	vha-19	FALSE	FALSE	FALSE	FALSE	0	FALSE	FALSE	FALSE	FALSE	FALSE	0	UNCHECKED
V	WBGene00021959	Y57E12AL.6	FALSE	FALSE	FALSE	FALSE	0	FALSE	FALSE	FALSE	FALSE	FALSE	0	UNCHECKED
IV	WBGene00021993	nsph-4.2	FALSE	FALSE	FALSE	FALSE	0	FALSE	FALSE	FALSE	FALSE	FALSE	0	UNCHECKED
I	WBGene00022042	icd-2	FALSE	FALSE	FALSE	FALSE	0	FALSE	FALSE	FALSE	FALSE	FALSE	0	UNCHECKED
IV	WBGene00022048	fln-1	FALSE	FALSE	FALSE	FALSE	0	FALSE	FALSE	FALSE	FALSE	FALSE	0	UNCHECKED
III	WBGene00022053	cisd-3.2	FALSE	FALSE	FALSE	FALSE	0	FALSE	FALSE	FALSE	FALSE	FALSE	0	UNCHECKED
IV	WBGene00022069	eel-1	FALSE	FALSE	FALSE	FALSE	0	FALSE	FALSE	FALSE	FALSE	FALSE	0	UNCHECKED
IV	WBGene00022072	cpg-9	FALSE	FALSE	FALSE	FALSE	0	FALSE	FALSE	FALSE	FALSE	FALSE	0	UNCHECKED
IV	WBGene00022075	nduv-3	FALSE	FALSE	FALSE	FALSE	0	FALSE	FALSE	FALSE	FALSE	FALSE	0	UNCHECKED
IV	WBGene00022089	Y69A2AR.18	FALSE	FALSE	FALSE	FALSE	0	FALSE	FALSE	FALSE	FALSE	FALSE	0	UNCHECKED
I	WBGene00022114	Y71F9AL.9	FALSE	FALSE	FALSE	FALSE	0	FALSE	FALSE	FALSE	FALSE	FALSE	0	UNCHECKED
I	WBGene00022122	trap-1	FALSE	FALSE	FALSE	FALSE	0	FALSE	FALSE	FALSE	FALSE	FALSE	0	UNCHECKED
I	WBGene00022127	yop-1	FALSE	FALSE	FALSE	FALSE	0	FALSE	FALSE	FALSE	FALSE	FALSE	0	UNCHECKED
III	WBGene00022170	cox-6B	FALSE	FALSE	FALSE	FALSE	0	FALSE	FALSE	FALSE	FALSE	FALSE	0	UNCHECKED
IV	WBGene00022235	sqd-1	FALSE	FALSE	FALSE	FALSE	0	FALSE	FALSE	FALSE	FALSE	FALSE	0	UNCHECKED
IV	WBGene00022245	acp-6	FALSE	FALSE	FALSE	FALSE	0	FALSE	FALSE	FALSE	FALSE	FALSE	0	UNCHECKED
I	WBGene00022276	nlp-40	FALSE	FALSE	FALSE	FALSE	0	FALSE	FALSE	FALSE	FALSE	FALSE	0	UNCHECKED
III	WBGene00022336	Y82E9BR.3	FALSE	FALSE	FALSE	FALSE	0	FALSE	FALSE	FALSE	FALSE	FALSE	0	UNCHECKED
IV	WBGene00022380	ndua-12	FALSE	FALSE	FALSE	FALSE	0	FALSE	FALSE	FALSE	FALSE	FALSE	0	UNCHECKED
III	WBGene00022497	Y119D3B.21	FALSE	FALSE	FALSE	FALSE	0	FALSE	FALSE	FALSE	FALSE	FALSE	0	UNCHECKED
III	WBGene00022599	daf-41	FALSE	FALSE	FALSE	FALSE	0	FALSE	FALSE	FALSE	FALSE	FALSE	0	UNCHECKED
V	WBGene00022642	lipl-5	FALSE	FALSE	FALSE	FALSE	0	FALSE	FALSE	FALSE	FALSE	FALSE	0	UNCHECKED
V	WBGene00022644	dod-19	FALSE	FALSE	FALSE	FALSE	0	FALSE	FALSE	FALSE	FALSE	FALSE	0	UNCHECKED
V	WBGene00022645	irg-8	FALSE	FALSE	FALSE	FALSE	0	FALSE	FALSE	FALSE	FALSE	FALSE	0	UNCHECKED
IV	WBGene00022678	sar-1	FALSE	FALSE	FALSE	FALSE	0	FALSE	FALSE	FALSE	FALSE	FALSE	0	UNCHECKED
I	WBGene00022748	oaz-1	FALSE	FALSE	FALSE	FALSE	0	FALSE	FALSE	FALSE	FALSE	FALSE	0	UNCHECKED
I	WBGene00022751	msrp-2	FALSE	FALSE	FALSE	FALSE	0	FALSE	FALSE	FALSE	FALSE	FALSE	0	UNCHECKED
I	WBGene00022754	nspd-1	FALSE	FALSE	FALSE	FALSE	0	FALSE	FALSE	FALSE	FALSE	FALSE	0	UNCHECKED
II	WBGene00022781	pmt-1	FALSE	FALSE	FALSE	FALSE	0	FALSE	FALSE	FALSE	FALSE	FALSE	0	UNCHECKED
III	WBGene00022793	ZK686.3	FALSE	FALSE	FALSE	FALSE	0	FALSE	FALSE	FALSE	FALSE	FALSE	0	UNCHECKED
I	WBGene00023068	rpl-41.2	FALSE	FALSE	FALSE	FALSE	0	FALSE	FALSE	FALSE	FALSE	FALSE	0	UNCHECKED
X	WBGene00023069	rncs-1	FALSE	FALSE	FALSE	FALSE	0	FALSE	FALSE	FALSE	FALSE	FALSE	0	UNCHECKED
X	WBGene00023263	D1005.t1	FALSE	FALSE	FALSE	FALSE	0	FALSE	FALSE	FALSE	FALSE	FALSE	0	UNCHECKED
V	WBGene00044080	D1086.10	FALSE	FALSE	FALSE	FALSE	0	FALSE	FALSE	FALSE	FALSE	FALSE	0	UNCHECKED
X	WBGene00045272	F59C12.4	FALSE	FALSE	FALSE	FALSE	0	FALSE	FALSE	FALSE	FALSE	FALSE	0	UNCHECKED
I	WBGene00077771	tspo-1	FALSE	FALSE	FALSE	FALSE	0	FALSE	FALSE	FALSE	FALSE	FALSE	0	UNCHECKED
X	WBGene00219609	linc-7	FALSE	FALSE	FALSE	FALSE	0	FALSE	FALSE	FALSE	FALSE	FALSE	0	UNCHECKED
V	WBGene00302980	F53E2.2	FALSE	FALSE	FALSE	FALSE	0	FALSE	FALSE	FALSE	FALSE	FALSE	0	UNCHECKED

## Sheet: README
Table S4: Novel NMD Target Identification and Other C. elegans Target Lists
