# Supplementary material for: Endonucleolytic cleavage is the primary mechanism of decay elicited byC. elegansnonsense-mediated mRNA decay
Source: HighWire-hosted journal article supplement (doi:10.1101/gr.280046.124), 2025-05-09
Supplement: Supplemental_Table_S6.xlsx [file Supplemental_Table_S6.xlsx]

## Sheet: Sheet1
Strain ID # (WJA)	Strain name in this study	Genotype	Source	Notes
WJA0639	wildtype (short-read)	N2	Thompson et al. 2013	Caenorhabditis Genetics Center Strain ID: VC2010
WJA0890	smg-2 (short-read)	smg-2(e2008)I	Hodgkin 1986	Unmapped ethyl methanesulfonate (EMS)-induced mutant.
WJA4004	smg-5 (short-read)	smg-5(r860)I	Hodgkin et al. 1989	Ethyl methanesulfonate (EMS)-induced mutant containing a single C→T transition creating a nonsense mutation at codon 17 (Q→UAA).
WJA4008	smg-6 (short-read)	smg-6(r896)III	Hodgkin et al. 1989	Unmapped ethyl methanesulfonate (EMS)-induced mutant.
WJA0891	smg-7 (short-read)	smg-7(r1197)IV	Cali et al. 1999	N-ethyl-N-nitrosourea (ENU)-induced mutant containing a single A→T transversion creating a nonsense mutation at codon 204 (L→UAG).
WJA5107	wildtype (N2)	xrn-1(srf5107)II	This study	VC2010-derived, C-term 3xFLAG tag on XRN-1; sequence with flanking homologies is: AAAAAGAAGCAATCGCGGCTCGGAAGCAATTTCAGCAATgattataaagatcatgacggagattataaagaccatgatattgattataaagatgacgatgataagATGCCTAAAGATCCAGCCAAACCTCCGGCCAAGGCACAAGTTGTGGGATGGCCACCGGTGAGATCATACCGGAAGAACGTGATGGTTTCCTGCCAAAAATCAAGCGGTGGCCCGGAGGCGGCGGCGTTCGTGAAGCCGACGGCTTCATCTTAAaaacgctcctctaaaacatttat.
WJA6017	smg-6	xrn-1(srf5107)II; smg-6(srf2102)III	Kim et al. 2022	VC2010-derived, D1070A point mutation within SMG-6 PIN domain, crossed with WJA5107.
WJA6022	smg-5	smg-5(srf6022)I; xrn-1(srf5107)II	This study	VC2010-derived, deletion and frameshift made in first exon of smg-5 by CRISPR/Cas9 using unc-58 as a marker; sequence about delete is TCACTGAAAAGTTCAAACGATATTGTAATCAACTGGAAAAATACGGCCAAACTGAAAATGTGCATTCTCCATGGCGATGTTGATGGCGATGTTGCGCAGAAAgtatgttttattctgtaacaaaaacttaaaatacaacagc, crossed with WJA5107.
Table S6: Strains used in this study

## Sheet: README
Table S6: Strains
